# Supplementary material for: Causal Effects of Body Mass Index on Airflow Obstruction and Forced Mid-Expiratory Flow: A Mendelian Randomization Study Taking Interactions and Age-Specific Instruments Into Consideration Toward a Life Course Perspective
Source: Front Public Health. 2021 May 11;9:584955. doi: 10.3389/fpubh.2021.584955 (PMC8144328; doi:10.3389/fpubh.2021.584955)
Supplement: Supplementary file 3 [file Table_1.XLSX]

## Sheet: Speliotes Score
rs number*	Chr:position**	Nearest gene***	Risk allele/non-risk allele	Effect size	MAF in SAPALDIA	Imputation quality (r2)
rs2815752	1:72812440	NEGR1	A/G	0.13	0.36	1
rs543874	1:177889480	SEC16B	G/A	0.22	0.17	1
rs1514175	1:74991644	FPGT-TNNI3K	A/G	0.07	0.41	1
rs1555543	1:96944797	PTBP2	C/A	0.06	0.44	0.99
rs2867125	2:622827	TMEM18	C/T	0.31	0.19	1
rs713586	2:25158008	DNAJC27	C/T	0.14	0.45	1
rs887912	2:59302877		T/C	0.1	0.29	1
rs2890652	2:142959931	LRP1B	C/T	0.09	0.16	0.97
rs9816226	3:185834499	ETV5	T/A	0.14	0.17	1
rs13078807	3:85884150	CADM2	G/A	0.1	0.19	1
rs10938397	4:45182527	GNPDA2	G/A	0.18	0.43	1
rs13107325	4:103188709	SLC39A8	T/C	0.19	0.07	0.96
rs2112347	5:75015242	POC5	T/G	0.1	0.35	0.99
rs4836133	5:124332103	ZNF608	A/C	0.07	0.47	0.99
rs987237	6:50803050	TFAP2B	G/A	0.13	0.18	1
rs206936	6:34302869	NUDT3	G/A	0.06	0.21	1
rs10968576	9:28414339	LINGO2	G/A	0.11	0.27	1
rs10767664	11:27725986	BDNF	A/T	0.19	0.24	0.99
rs3817334	11:47650993	MTCH2	T/C	0.06	0.39	0.99
rs4929949	11:8604593	STK33	C/T	0.06	0.48	1
rs7138803	12:50247468	BCDIN3D	A/G	0.12	0.37	1
rs4771122	13:28020180	MTIF3	G/A	0.09	0.25	0.96
rs10150332	14:79936964	NRXN3	C/T	0.13	0.19	0.99
rs11847697	14:30515112	PRKD1	T/C	0.17	0.04	0.95
rs2241423	15:68086838	MAP2K5	G/A	0.13	0.23	1
rs1558902	16:53803574	FTO	A/T	0.39	0.43	1
rs7359397	16:28885659	SH2B1	T/C	0.15	0.33	1
rs12444979	16:19933600	GPRC5B	C/T	0.17	0.13	1
rs571312	18:57839769	MC4R	A/C	0.23	0.25	1
rs29941	19:34309532	KCTD15	G/A	0.06	0.3	1
rs2287019	19:46202172	QPCTL	C/T	0.15	0.19	1
rs3810291	19:47569003	ZC3H4	A/G	0.09	0.32	0.89
		* 32 SNPs reported by Speliotes et al 2010 were included.
		** GRCh37
		*** Nearest gene within ± 500kb of the SNP, retrieved by SNIPPER v1.2 (http://csg.sph.umich.edu/boehnke/snipper/)

## Sheet: Felix Score
rs number*	Chr:position**	Nearest gene***	Risk allele/non-risk allele	Effect size	MAF in SAPALDIA	Imputation quality (r2)
rs543874b	1:177889480	SEC16B/RGPR-p117/LZTR2/SEC16S/PGPR-p117/RGPR	G/A	0.077	0.17	1
rs7550711	1:110082886	GPR61/BALGR/GPCR3	T/C	0.105	0.02	0.97
rs11676272	2:25141538	ADCY3/AC3/BMIQ19/AC-III	G/A	0.068	0.45	0.99
rs13130484	4:45175691	GNPDA2/SB52/GNP2	T/C	0.067	0.43	1
rs987237	6:50803050	TFAP2B/PDA2/AP2-B/AP-2B	G/A	0.062	0.18	1
rs13253111	8:28061974	ELP3/KAT9	A/G	0.042	0.45	1
rs3829849	9:129390800	LMX1B/NPS1/LMX1.2	T/C	0.041	0.37	1
rs7132908	12:50263148	FAIM2/LFG/NMP35/LFG2/NGP35/TMBIM2	A/G	0.066	0.37	0.98
rs12429545	13:54102206	OLFM4/bA209J19.1/GW112/OlfD/GC1/hGC-1/hOLfD/OLM4/UNQ362	A/G	0.076	0.12	1
rs1421085	16:53800954	FTO/ALKBH9/BMIQ14/GDFD	C/T	0.059	0.43	1
rs6567160	18:57829135	MC4R	C/T	0.05	0.25	1
rs8092503	18:52479487	RAB27B/C25KG	G/A	0.045	0.2	1
		* 12 out of 15 SNPs reported by Felix et al 2016 were included after excluding 2 SNPs with smoking association and one SNP based on visual inspection of MR Egger results.
		** GRCh37
		*** Nearest gene within ± 500kb of the SNP, retrieved by SNIPPER v1.2 (http://csg.sph.umich.edu/boehnke/snipper/)

## Sheet: Yengo Score
rs number*	Chr:position**	Nearest gene***	Risk allele/non-risk allele	Effect size	MAF in SAPALDIA	Imputation quality (r2)
rs10733051	1:167280354	POU2F1/oct-1B/OTF1/OCT1	A/G	0.0097	0.43	0.99
rs10754210	1:197012111	F13B/FXIIIB	A/G	-0.0123	0.35	1
rs10779751	1:11284336	MTOR/RAFT1/SKS/FRAP1/FRAP2/RAPT1/FRAP	A/G	0.0139	0.27	0.99
rs10915840	1:225668524	ENAH/ENA/MENA/NDPP1	A/G	-0.0118	0.3	1
rs10920678	1:190239907	FAM5C/DBCCR1L1/FAM5C/DBCCR1L	A/G	0.0155	0.43	1
rs10923724	1:119546842	TBX15/TBX14	T/C	-0.0118	0.46	1
rs11118308	1:219633869	LYPLAL1/Q96AV0	A/G	0.0101	0.49	0.98
rs11208662	1:65987164	LEPR/LEPRD/CD295/LEP-R/OBR/OB-R	C/G	0.0209	0.09	1
rs11577179	1:155983710	SSR2/TRAP-BETA/HSD25/TRAPB/TLAP	A/G	-0.0108	0.36	1
rs1158103	1:101024370	GPR88/COCPMR/STRG	A/G	-0.009	0.44	0.97
rs11583122	1:38053458	GNL2/NGP1/Nug2/Ngp-1/HUMAUANTIG/Nog2	T/C	0.0182	0.06	0.98
rs11803119	1:174002465	RC3H1/ROQUIN/RNF198	A/T	-0.0012	0.01	0.8
rs12033257	1:112318484	KCND3/KCND3S/KV4.3/BRGDA9/SCA19/KSHIVB/SCA22/KCND3L	A/G	0.0146	0.4	0.95
rs12035149	1:107885018	NTNG1/Lmnt1	C/G	-0.0146	0.24	1
rs12035349	1:77557339	PIGK/GPI8	A/G	-0.0188	0.1	1
rs12041258	1:195047936		T/C	0.0146	0.22	0.99
rs12042908	1:74997762	FPGT-TNNI3K/CARK/TNNI3K	A/G	0.0184	0.44	0.99
rs12042959	1:243533273	SDCCAG8/hCCCAP/BBS16/SLSN7/NY-CO-8/CCCAP/NPHP10/HSPC085	A/G	0.0144	0.17	0.98
rs12044597	1:1708801	NADK/dJ283E3.1	A/G	-0.0143	0.48	1
rs12564992	1:174478100	RABGAP1L/TBC1D18/HHL	A/G	-0.0196	0.13	0.99
rs12731372	1:118852975	SPAG17/CT143/PF6	T/C	0.0116	0.2	0.95
rs17014375	1:209543560		T/G	-0.0172	0.14	1
rs17302346	1:174983543	MRPS14/S14mt/MRP-S14/COXPD38/HSMRPS14/DJ262D12.2	T/C	-0.0201	0.02	0.54
rs1730859	1:107617707	PRMT6/HRMT1L6	A/G	-0.0118	0.32	0.95
rs17391694	1:78623626	GIPC2/SEMCAP2/SEMCAP-2	T/C	0.0317	0.1	0.94
rs17448682	1:15966713	DDI2	T/C	0.0099	0.24	0.95
rs17531363	1:107977075	NTNG1/Lmnt1	A/C	0.0133	0.28	0.99
rs1973993	1:96943994	PTBP2/nPTB/brPTB/PTBLP	T/C	-0.0208	0.43	1
rs2030342	1:97388226	PTBP2/nPTB/brPTB/PTBLP	T/C	0.0143	0.44	1
rs2154297	1:80791708		T/C	-0.0115	0.29	1
rs2275426	1:46487552	MAST2/MTSSK/MAST205	A/G	0.0104	0.46	1
rs2282231	1:39569571	MACF1/ACF7/MACF/ABP620/OFC4/LIS9	T/C	0.0165	0.23	0.99
rs2356865	1:50836334	DMRTA2	T/C	-0.0114	0.33	1
rs2481665	1:62594677	INADL/hINADL/InaD-like/INADL/Cipp	T/C	0.0161	0.44	1
rs2491864	1:242986063		A/G	0.0137	0.2	0.99
rs2820311	1:201841476	IPO9/Imp9	A/G	-0.0235	0.28	0.99
rs284227	1:82379446	LPHN2/LPHH1/CIRL2/LEC1/CL2/LPHN2	T/C	-0.0147	0.23	1
rs346722	1:45620134	ZSWIM5	T/C	-0.0027	0.11	0.88
rs3753549	1:243722892	AKT3/PKB-GAMMA/STK-2/PRKBG/RAC-gamma/MPPH2/MPPH/PKBG/RAC-PK-gamma	T/C	-0.0203	0.12	0.99
rs3762396	1:19510394	UBR4/RBAF600/p600/ZUBR1	A/G	0.0073	0.42	1
rs3768486	1:110123971	GNAI3/87U6/ARCND1	A/G	-0.0096	0.18	0.99
rs4372296	1:98320492	DPYD/DPD/DHPDHASE/DHP	A/C	-0.0133	0.22	1
rs4653017	1:33776728	ZNF362/RN/lin-29	T/C	0.0122	0.35	0.99
rs543874	1:177889480	SEC16B/RGPR-p117/LZTR2/SEC16S/PGPR-p117/RGPR	A/G	-0.0475	0.17	1
rs6577584	1:6715390	DNAJC11/dJ126A5.1	T/G	-0.0131	0.36	1
rs6587552	1:151018861	BNIPL/BNIP-Sbeta/PP753/BNIP-Salpha/BNIPL-1/BNIPL-2/BNIPL1/BNIP-S/BNIPL2/BNIPS	A/G	0.0173	0.24	0.98
rs6681627	1:174126742	RABGAP1L/TBC1D18/HHL	A/C	0.0025	0.16	1
rs6690764	1:92976590	EVI5/EVI-5/NB4S	A/G	-0.0154	0.22	1
rs6700816	1:174883994	RABGAP1L/TBC1D18/HHL	A/T	0.0345	0.04	0.98
rs6700838	1:47700027	TAL1/tal-1/SCL/TCL5/bHLHa17	T/C	-0.017	0.36	1
rs696606	1:16828640	CROCCP3/CROCCL2/dJ798A10.2	A/G	0.0095	0.45	0.79
rs7531118	1:72837239	NEGR1/KILON/IGLON4/Ntra/DMML2433	T/C	-0.0256	0.45	1
rs7531656	1:49828663	AGBL4/CCP6	A/G	0.0195	0.32	1
rs7535528	1:2444414	PANK4	A/G	-0.0152	0.4	1
rs7550711	1:110082886	GPR61/BALGR/GPCR3	T/C	0.0649	0.02	0.97
rs7556169	1:8741401	RERE/ARP/DNB1/NEDBEH/ATN1L/ARG	A/G	-0.0103	0.46	0.99
rs761423	1:17301672	MFAP2/MAGP1/MAGP/MAGP-1	T/C	0.0113	0.43	1
rs785278	1:33307987	S100PBP/S100PBPR	A/T	-0.0159	0.18	0.97
rs823074	1:205774839	SLC41A1/MgtE	T/C	0.0112	0.41	1
rs905938	1:154991389	DCST2	T/C	-0.0149	0.24	0.99
rs9077	1:202116238	PTPN7/PTPNI/BPTP-4/LPTP/LC-PTP/HEPTP	A/G	-0.0138	0.37	0.99
rs9426003	1:34602870	CSMD2/dJ1007G16.1/dJ947L8.1/dJ1007G16.2	A/G	-0.0116	0.26	0.97
rs946526	1:46487168	MAST2/MTSSK/MAST205	T/C	-0.0314	0.03	0.84
rs967605	1:23399932	KDM1A/AOF2/CPRF/KDM1/BHC110/LSD1	T/C	-0.0192	0.17	1
rs10168197	2:51834839		C/G	-0.0113	0.2	0.99
rs10182181	2:25150296	ADCY3/AC3/BMIQ19/AC-III	A/G	-0.0325	0.45	1
rs10190332	2:61619267	USP34	T/G	0.0037	0.37	0.97
rs10203277	2:103496700	TMEM182	A/G	0.0044	0.13	1
rs10211055	2:229016917	SPHKAP/SKIP	T/C	-0.0157	0.37	0.96
rs10929925	2:6155557	LOC400940	A/C	-0.0143	0.47	0.99
rs10930641	2:175000711	OLA1/GBP45/PTD004/GTPBP9/GTBP9/DOC45	A/G	-0.0137	0.42	1
rs11889536	2:220163543	PTPRN/R-PTP-N/IA-2/ICA512/IA-2/PTP/IA2	A/G	0.0189	0.15	0.96
rs12479233	2:228891702	SPHKAP/SKIP	A/T	-0.0121	0.49	0.99
rs12615778	2:102436738	MAP4K4/HEL-S-31/NIK/FLH21957/HGK/MEKKK4	A/G	0.0104	0.29	0.98
rs12694021	2:206084372	PARD3B/PAR3L/ALS2CR19/PAR3beta/PAR3B	A/C	0.0106	0.45	1
rs12713433	2:61307982	KIAA1841	T/C	0.0088	0.22	1
rs12991989	2:199169278	PLCL1/PLDL1/PRIP/PPP1R127/PLCE/PLCL	C/G	0.0035	0.48	0.99
rs13021737	2:632348	TMEM18/lncND	A/G	-0.0574	0.19	1
rs13417156	2:62848319	EHBP1/NACSIN/HPC12	T/C	-0.0144	0.4	0.97
rs13432055	2:56603985	CCDC85A	T/C	-0.0117	0.3	0.99
rs1371108	2:81816251		A/C	0.0119	0.31	1
rs1437929	2:211983316	ERBB4/p180erbB4/ALS19/HER4	A/G	0.0135	0.27	0.99
rs1451533	2:105466005		A/G	0.0167	0.26	0.98
rs16828086	2:151198990	RND3/ARHE/Rho8/RhoE/memB	C/G	0.0103	0.36	0.95
rs17035438	2:46878616	CRIPT/SSMDF/HSPC139	A/G	0.0199	0.07	0.99
rs17203016	2:208255518	CREB1/CREB/CREB-1	A/G	-0.015	0.16	1
rs17327461	2:35512183		T/C	0.0125	0.44	0.99
rs17551974	2:142293146	LRP1B/LRP-DIT/LRP-1B/LRPDIT	A/C	-0.0141	0.18	1
rs2194385	2:50865334	NRXN1/SCZD17/Hs.22998/PTHSL2	A/C	0.0091	0.48	1
rs2724861	2:471514	FAM150B/PRO1097/AUGA/RGPG542/FAM150B	A/G	-0.0092	0.42	1
rs2890652	2:142959931	LRP1B/LRP-DIT/LRP-1B/LRPDIT	T/C	-0.017	0.16	0.97
rs2902021	2:67825685	ETAA1/ETAA16	T/C	0.0136	0.17	0.97
rs2974255	2:516696	TMEM18/lncND	A/G	0.0092	0.21	0.89
rs3922853	2:5830599	SOX11/MRD27	A/C	0.0123	0.17	1
rs4303732	2:100830040	LONRF2/RNF192	T/C	0.0144	0.36	1
rs4372836	2:28973883	PPP1CB/NSLH2/PPP1CD/PP1beta/PP-1B/PP1B/HEL-S-80p	T/C	0.0142	0.28	1
rs453520	2:147907202		T/C	-0.015	0.4	0.99
rs4639527	2:416815	FAM150B/PRO1097/AUGA/RGPG542/FAM150B	A/G	-0.0172	0.3	0.95
rs4670626	2:37046657	VIT/VIT1	T/C	-0.0113	0.34	1
rs4671328	2:58935282		T/G	0.0219	0.43	0.99
rs4671358	2:60164634		A/T	0.0101	0.41	0.99
rs4673553	2:211608379	CPS1/CPSASE1/PHN	T/G	-0.0142	0.43	1
rs4676084	2:110010962	SH3RF3/POSH2/SH3MD4	A/G	0.0098	0.42	0.96
rs4854326	2:603088	TMEM18/lncND	A/G	-0.0019	0.31	0.99
rs6545714	2:59307725		A/G	-0.0191	0.37	1
rs6548221	2:295255	FAM150B/PRO1097/AUGA/RGPG542/FAM150B	A/G	0.0151	0.23	1
rs6710871	2:143960593	ARHGAP15/BM046	A/G	0.0179	0.15	1
rs6711584	2:104421692		A/G	0.0128	0.48	0.98
rs6713781	2:40291940	SLC8A1/NCX1	C/G	-0.0123	0.42	0.99
rs6720868	2:230663576	TRIP12/TRIP-12/MRD49/ULF	T/C	0.0155	0.36	0.99
rs6738445	2:172599615	DYNC1I2/DIC74/IC2/DNCI2	T/C	-0.0133	0.3	0.98
rs6753170	2:58481863	FANCL/POG/FAAP43/PHF9	T/C	-0.0031	0.39	0.99
rs7425440	2:512490	TMEM18/lncND	T/C	0.0104	0.19	1
rs7557796	2:86766153	RNF103-VPS24/VPS24/CGI149/CHMP3/NEDF/RNF103-VPS24/hVps24	T/C	0.016	0.32	0.99
rs7560871	2:145616899	DKFZp686O1327/LINC00953/DKFZp686O1327	A/G	0.0218	0.06	1
rs7561278	2:48954905	LHCGR/LCGR/LH/CGR/LGR2/LHRHR/ULG5/HHG/LHR/LSH-R/LH/CG-R	T/C	0.0159	0.22	0.9
rs7564679	2:204012790	NBEAL1/A530083I02Rik/ALS2CR16/ALS2CR17	A/G	-0.0116	0.42	0.99
rs7598402	2:50735943	NRXN1/SCZD17/Hs.22998/PTHSL2	C/G	0.0122	0.48	0.98
rs7599312	2:213413231	ERBB4/p180erbB4/ALS19/HER4	A/G	-0.0186	0.25	1
rs7600699	2:156018263	KCNJ3/KGA/KIR3.1/GIRK1	C/G	-0.0149	0.17	0.95
rs7601895	2:55281901	RTN4/RTN-X/ASY/NSP-CL/Nbla00271/NOGO/NI220/250/RTN4-B2/NSP/Nbla10545/RTN4-A/RTN4-B1/RTN4-C	C/G	0.0149	0.28	0.97
rs7607351	2:69562127	GFPT1/GFAT1/GFAT1m/GFPT/CMS12/MSLG/GFAT/CMSTA1/GFA/GFPT1L	T/C	0.0119	0.42	1
rs7607369	2:219279097	VIL1/D2S1471/VIL	A/G	0.0117	0.45	0.93
rs7607490	2:12851120	TRIB2/GS3955/C5FW/TRB2	A/G	0.0148	0.11	0.96
rs902695	2:113955074	PSD4/EFA6B/TIC	A/G	-0.0103	0.49	1
rs919433	2:198166565	ANKRD44/PP6-ARS-B	A/G	0.0036	0.3	0.99
rs929641	2:58792377		A/G	0.015	0.44	0.99
rs930295	2:50233352	NRXN1/SCZD17/Hs.22998/PTHSL2	A/C	0.0211	0.17	1
rs934515	2:79482643	REG3A/HIP/PAP/HIP/PAP/PAP-H/REG-III/PBCGF/REG3/INGAP/PAP1	A/G	0.0185	0.12	1
rs9630985	2:181607676	UBE2E3/UBCH9/UbcM2	A/C	-0.0177	0.33	0.98
rs968972	2:51171962	NRXN1/SCZD17/Hs.22998/PTHSL2	A/G	0.0089	0.37	1
rs972540	2:207244783	ADAM23/MDC3/MDC-3	A/G	-0.013	0.26	1
rs980329	2:60285100	BCL11A/BCL11A-S/DILOS/BCL11A-XL/HBFQTL5/CTIP1/ZNF856/EVI9/BCL11a-M/BCL11A-L	T/C	-0.0133	0.25	1
rs984902	2:81358877	CTNNA2/CAP-R/CT114/CDCBM9/CTNR/CAPR	A/T	0.0113	0.12	1
rs993954	2:188325474	TFPI/LACI/TFI/TFPI1/EPI	T/G	0.0084	0.45	0.99
rs10460960	3:42308735	CCK	A/G	0.0197	0.1	0.97
rs10510321	3:6009092		T/C	0.0114	0.2	0.99
rs10511093	3:83763541		T/C	-0.0228	0.08	1
rs10865858	3:34700713		T/C	0.0092	0.37	0.99
rs10935143	3:134665159	EPHB1/ELK/NET/EPHT2/Hek6	A/G	-0.0109	0.46	0.99
rs11128760	3:15873407	ANKRD28/PITK/PPP1R65	A/G	0.011	0.39	1
rs11711337	3:21794904	ZNF385D/ZNF659	A/T	-0.0104	0.27	0.98
rs11915371	3:70539559	FOXP1/MFH/12CC4/QRF1/hFKH1B/HSPC215	A/C	-0.0149	0.2	1
rs12488237	3:56114861	ERC2/Spc110/CAST/CAST1/ELKSL/SPBC110	T/C	-0.0235	0.04	0.93
rs12631248	3:50080174	RBM6/DEF3/3G2/HLC-11/DEF-3/g16/NY-LU-12	C/G	-0.0253	0.07	1
rs12638746	3:89331055	EPHA3/ETK1/HEK4/TYRO4/ETK/EK4/HEK	A/G	-0.0092	0.34	0.97
rs13072095	3:193639623		T/C	0.0095	0.35	1
rs13085472	3:171129859	TNIK/MRT54	T/C	0.0098	0.37	0.99
rs13095652	3:51243837	DOCK3/NEDIDHA/MOCA/PBP	T/C	-0.0085	0.44	0.93
rs1320903	3:131758077	CPNE4/COPN4/CPN4	A/G	0.0216	0.29	1
rs13321566	3:107342662	BBX/HSPC339/MDS001/HBP2/ARTC1	A/G	-0.0135	0.17	0.99
rs1375561	3:85658230	CADM2/Necl-3/synCAM2/NECL3/IGSF4D/SynCAM2	T/C	0.0173	0.34	1
rs1436343	3:104606130	ALCAM/MEMD/CD166	A/G	-0.0141	0.42	0.99
rs1452075	3:62481063	CADPS/CADPS1/UNC-31/CAPS1/CAPS	T/C	0.0141	0.27	1
rs1454148	3:176341188	TBL1XR1/IRA1/C21/TBLR1/DC42/MRD41	T/C	0.0106	0.27	0.99
rs1454687	3:94038085	NSUN3/MST077/MSTP077	C/G	0.0202	0.47	1
rs1554193	3:8138801		A/T	-0.0103	0.46	0.97
rs1600136	3:136979939	IL20RB/DIRS1/FNDC6/IL-20R2	A/C	-0.0081	0.19	0.99
rs16823670	3:115071668	ZBTB20/HOF/DPZF/ODA-8S/PRIMS/ZNF288	A/G	0.0261	0.02	0.99
rs16851483	3:141275436	RASA2/GAP1M	T/G	0.0369	0.06	0.99
rs17199978	3:136056184	STAG1/SCC3A/SA1/MRD47	A/G	0.0025	0.08	1
rs17681451	3:114399296	ZBTB20/HOF/DPZF/ODA-8S/PRIMS/ZNF288	A/G	-0.0197	0.09	1
rs181732	3:136744386	IL20RB/DIRS1/FNDC6/IL-20R2	T/G	-0.0019	0.44	1
rs1899951	3:12394840	PPARG/PPARgamma/GLM1/PPARG2/PPARG1/CIMT1/NR1C3	T/C	0.017	0.11	1
rs1909586	3:124687767	HEG1/MSTP112/MST112/HEG	T/G	-0.0106	0.4	0.98
rs2047632	3:37153431	LRRFIP2/HUFI-2	C/G	-0.0253	0.02	0.97
rs2122042	3:85866335	CADM2/Necl-3/synCAM2/NECL3/IGSF4D/SynCAM2	T/G	0.0235	0.21	1
rs2124499	3:123093541	ADCY5/FDFM/AC5	C/G	-0.0123	0.38	0.99
rs2230929	3:49343175	USP4/UNP/Unph	A/G	-0.0048	0.2	0.99
rs2293605	3:184044433	EIF4G1/EIF-4G1/PARK18/P220/EIF4GI/EIF4G/EIF4F	T/C	-0.0167	0.12	0.95
rs2365389	3:61236462	FHIT/AP3Aase/FRA3B	T/C	-0.0174	0.42	0.99
rs262956	3:183486117	YEATS2	T/G	0.0125	0.32	0.99
rs2680648	3:53777176	CACNA1D/SANDD/CCHL1A2/Cav1.3/CACN4/PASNA/CACNL1A2/CACH3	T/C	0.016	0.26	0.99
rs2710323	3:52815905	ITIH1/ITIH/SHAP/H1P/ITI-HC1/IATIH/IGHEP1	T/C	-0.0141	0.5	0.99
rs28350	3:42418446	LYZL4/LYZA/LYC4	A/G	0.0177	0.21	0.96
rs355777	3:154034950	DHX36/RHAU/DDX36/MLEL1/G4R1	C/G	0.0153	0.43	0.99
rs3731544	3:48207997	CDC25A/CDC25A2	A/C	0.0214	0.06	0.89
rs3772934	3:115417865	GAP43/B-50/PP46	T/C	0.0103	0.27	1
rs3821841	3:52084040	DUSP7/MKPX/PYST2	T/C	-0.0157	0.09	0.99
rs3849570	3:81792112	GBE1/APBD/GSD4/GBE	A/C	0.0132	0.33	0.96
rs3915844	3:9514856	SETD5	A/G	0.0152	0.15	0.99
rs39654	3:173095123	NLGN1/NL1	A/G	-0.0145	0.49	0.94
rs4273371	3:108119071	MYH15	T/C	-0.0115	0.5	1
rs4342060	3:137215820	SOX14/SOX28	T/C	-0.0051	0.19	1
rs4624596	3:119571541	GSK3B	T/C	0.0136	0.17	1
rs4678297	3:136907111	IL20RB/DIRS1/FNDC6/IL-20R2	T/C	0.0043	0.3	1
rs4858193	3:20441050	SGOL1/NY-BR-85/CAID/SGOL1/SGO	T/C	0.0129	0.24	0.97
rs5396	3:170744815	SLC2A2/GLUT2	T/C	-0.0154	0.3	0.96
rs580438	3:13345450	NUP210/POM210/GP210	T/C	0.0114	0.34	1
rs6442021	3:46742019	TMIE/DFNB6	T/C	-0.009	0.41	1
rs6442101	3:48130893	MAP4	T/C	-0.0117	0.35	0.99
rs6443750	3:181329682	SOX2OT/SOX2OT/NCRNA00043	T/C	-0.0148	0.17	0.88
rs6764533	3:196088464	UBXN7/UBXD7	A/G	0.0116	0.38	0.96
rs6767619	3:156893782	CCNL1/ania-6a/ANIA6A/BM-001/PRO1073	C/G	0.0119	0.37	0.98
rs6786125	3:28727523	ZCWPW2/ZCW2	C/G	-0.012	0.17	1
rs6786582	3:135898984	MSL2/MSL-2/MSL2L1/RNF184	T/C	-0.0159	0.25	0.98
rs6803870	3:89443784	EPHA3/ETK1/HEK4/TYRO4/ETK/EK4/HEK	T/C	0.0084	0.18	0.93
rs6804181	3:116937546		A/T	0.0153	0.19	0.99
rs6804842	3:25106437	RARB/HAP/NR1B2/RRB2/RARbeta1/MCOPS12	A/G	-0.0156	0.42	1
rs7615297	3:156299313	SSR3/TRAPG	C/G	0.0149	0.13	1
rs7616371	3:137047387	IL20RB/DIRS1/FNDC6/IL-20R2	A/G	-0.0022	0.06	0.96
rs7640424	3:107820063	CD47/OA3/IAP/MER6	T/C	-0.0136	0.29	0.97
rs775731	3:77624784	ROBO2/SAX3	T/C	-0.0108	0.39	0.97
rs827092	3:157985182	RSRC1/BM-011/SRrp53/SFRS21	T/C	0.0129	0.45	1
rs925018	3:62713143	CADPS/CADPS1/UNC-31/CAPS1/CAPS	C/G	-0.013	0.34	1
rs9289499	3:135484734	PPP2R3A/PPP2R3/PR72/PR130	T/C	-0.0031	0.1	0.99
rs9809534	3:125189782	SNX4/ATG24B	C/G	0.0164	0.12	1
rs9814633	3:41310470	ULK4/FAM7C1/REC01035	A/G	0.0122	0.34	0.99
rs9816226	3:185834499	ETV5/ERM	A/T	-0.0323	0.17	1
rs9832305	3:89392778	EPHA3/ETK1/HEK4/TYRO4/ETK/EK4/HEK	T/C	-0.0073	0.24	0.94
rs9838283	3:50820486	DOCK3/NEDIDHA/MOCA/PBP	A/G	0.0161	0.14	0.81
rs9846123	3:49088112	QRICH1/VERBRAS/AB-DIP	T/C	-0.0011	0.37	0.99
rs1000096	4:38692835	KLF3/BKLF	T/C	-0.0144	0.35	1
rs10938397	4:45182527	GNPDA2/SB52/GNP2	A/G	-0.0324	0.43	1
rs11736228	4:147376805	SLC10A7/P7/SSASKS/C4orf13	A/T	0.0139	0.26	1
rs11945861	4:65700865		A/G	-0.0148	0.24	0.97
rs1296328	4:137083193		A/C	0.0179	0.45	0.93
rs13107325	4:103188709	SLC39A8/PP3105/ZIP8/BIGM103/CDG2N/LZT-Hs6	T/C	0.047	0.07	0.96
rs13110266	4:162129844	FSTL5	A/G	-0.0117	0.4	1
rs1323068	4:20263058	SLIT2/Slit-2/SLIL3	A/G	-0.0114	0.3	0.99
rs1345148	4:30843533	PCDH7/BH-Pcdh/PPP1R120/BHPCDH	T/C	-0.0111	0.36	1
rs1403846	4:119101723	NDST3/HSST3	T/C	0.0116	0.16	0.98
rs1455137	4:145986668	ANAPC10/APC10/DOC1	A/C	-0.0106	0.37	1
rs1477887	4:18514827	LCORL/MLR1	A/G	-0.0138	0.41	1
rs1492767	4:55221467	PDGFRA/CD140A/PDGFR-2/PDGFR2	T/C	0.0094	0.49	1
rs1522569	4:171632637	HSP90AA6P/HSP90Af	T/G	0.0164	0.17	1
rs17538472	4:163038241	FSTL5	T/C	0.0129	0.19	1
rs1866510	4:44514468	KCTD8	T/C	-0.0105	0.32	0.96
rs1903579	4:91253956	FAM190A/FAM190A	C/G	0.0111	0.44	1
rs2192158	4:55505360	KIT/PBT/CD117/C-Kit/SCFR/MASTC	A/G	0.0129	0.47	1
rs2850969	4:102183594	PPP3CA/PPP2B/CCN1/CNA1/IECEE/CALNA1/CALNA/CALN/ACCIID/IECEE1	T/C	-0.0165	0.12	1
rs326889	4:112713436	C4orf32/C4orf32	T/C	-0.0129	0.39	0.99
rs331949	4:143663206	INPP4B	T/C	-0.011	0.36	0.99
rs4148155	4:89054667	ABCG2/BCRP1/BCRP/MRX/EST157481/GOUT1/MXR/CDw338/CD338/ABC15/ABCP/UAQTL1/MXR1/MXR-1/BMDP	A/G	0.0188	0.11	1
rs4524456	4:6492739	PPP2R2C/PR55G/IMYPNO1/PR52/IMYPNO/B55-GAMMA/B55gamma	A/G	-0.0086	0.48	1
rs4864201	4:130731284		T/C	0.0141	0.36	1
rs6448587	4:28561990	MIR4275	A/C	0.0167	0.22	1
rs6827083	4:153075491	FBXW7/AGO/hCdc4/FBW7/FBW6/SEL-10/hAgo/FBX30/SEL10/FBXO30/CDC4/FBXW6	A/G	-0.0097	0.42	1
rs6843738	4:103936001	NHEDC1/NHA1/NHEDC1	A/G	-0.0107	0.33	1
rs711347	4:52926216	SPATA18/Mieap/SPETEX1	A/T	-0.0122	0.22	1
rs7377083	4:102708997	BANK1/BANK	A/C	0.02	0.43	0.78
rs7674623	4:80794681	GDEP/PCA4/PCAN1/GDEP	T/C	0.0135	0.21	0.99
rs7683836	4:180167906		A/G	-0.0114	0.45	0.97
rs7692088	4:10491040	CLNK/MIST	C/G	0.0074	0.49	0.99
rs7694732	4:115124089	ARSJ/ASJ	A/G	0.0099	0.44	0.99
rs925421	4:60253877		A/G	0.0116	0.28	0.97
rs9291467	4:25428296	ANAPC4/APC4	T/C	0.014	0.49	0.99
rs10037047	5:88219964	MEF2C/C5DELq14.3/DEL5q14.3	A/G	-0.0056	0.16	0.93
rs10066835	5:151254297	GLRA1/STHE/HKPX1	T/C	0.0428	0.02	0.95
rs1014194	5:168192944	SLIT3/SLIT-1/SLIT3/SLIL1/MEGF4	A/C	0.0102	0.36	1
rs12189178	5:50914726	ISL1/ISLET1/Isl-1	T/C	0.0364	0.04	0.97
rs12514473	5:80818639	SSBP2/SOSS-B2/HSPC116	T/C	0.0167	0.21	0.99
rs12655756	5:88858208	MIR3660/mir-3660	A/T	0.0138	0.4	0.98
rs12659802	5:152274478	NMUR2/FM-4/NMU2R/FM4/NMU-R2/TGR-1/TGR1	A/G	0.0089	0.29	1
rs13163306	5:136571959	SPOCK1/TIC1/SPOCK/TESTICAN	A/G	-0.0094	0.47	1
rs13174863	5:139080745	CXXC5/RINF/CF5/HSPC195/WID	A/G	-0.0192	0.17	0.9
rs13175892	5:87866793		T/C	-0.0215	0.03	0.92
rs159032	5:94206202	MCTP1	T/C	0.0129	0.24	0.99
rs1650586	5:157516393	CLINT1/ENTH/EPNR/CLINT/EPN4	T/G	0.0134	0.11	1
rs17056301	5:158271680	EBF1/COE1/O/E-1/EBF/OLF1	T/C	-0.0118	0.26	0.98
rs17285919	5:86908920	CCNH/CAK/p37/p34/CycH	T/C	0.0004	0.14	1
rs17525725	5:167293652	ODZ2/TEN-M2/ten-2/ODZ2/TNM2	A/G	-0.0083	0.46	0.97
rs17591778	5:86420392	MIR4280	A/G	0.0075	0.21	0.95
rs186543	5:86754835	CCNH/CAK/p37/p34/CycH	C/G	-0.008	0.47	0.98
rs2098618	5:87934851		A/T	-0.0102	0.07	0.79
rs2190788	5:144484261		T/G	0.0141	0.32	0.98
rs2304607	5:87988733		A/G	-0.032	0.16	1
rs2307111	5:75003678	POC5/C5orf37	T/C	0.0265	0.39	1
rs2367112	5:64168193	CWC27/NY-CO-10/SDCCAG10/RPSKA/SDCCAG-10	T/G	0.0119	0.44	0.99
rs248139	5:167352783	ODZ2/TEN-M2/ten-2/ODZ2/TNM2	A/G	0.0133	0.2	0.99
rs254428	5:141777439	SPRY4/HH17	T/G	0.0081	0.43	0.95
rs25832	5:66175682	MAST4	A/G	0.0118	0.27	0.99
rs2611742	5:95856501	PCSK1/PC3/BMIQ12/PC1/SPC3/NEC1	T/C	-0.0152	0.41	1
rs368863	5:77372852	AP3B1/HPS/HPS2/ADTB3/ADTB3A/PE	T/C	-0.0117	0.22	0.99
rs3822683	5:96080883	CAST/PLACK/BS-17	A/G	0.0145	0.24	1
rs3844598	5:140992235	DIAPH1/DRF1/LFHL1/DFNA1/SCBMS/hDIA1/DIA1	A/G	-0.0095	0.47	1
rs40067	5:107439012	FBXL17/FBXO13/Fbl17/Fbx13	A/G	-0.0266	0.17	1
rs4518345	5:27185904	CDH9	A/G	-0.0117	0.29	1
rs4643949	5:138372345	SIL1/ULG5/MSS/BAP	T/C	-0.0001	0.35	1
rs4916661	5:87932809		T/G	-0.0034	0.34	0.92
rs6235	5:95728898	PCSK1/PC3/BMIQ12/PC1/SPC3/NEC1	C/G	-0.0175	0.26	0.99
rs6449531	5:60712212	ZSWIM6/AFND/NEDMAGA	A/G	-0.0127	0.33	1
rs6595205	5:119372533	FAM170A/ZNFD	C/G	0.0114	0.48	0.98
rs6877851	5:130356413	HINT1/PKCI-1/PRKCNH1/NMAN/HINT	C/G	-0.0125	0.23	1
rs6879326	5:59208302	PDE4D/STRK1/DPDE3/PDE43/ACRDYS2/PDE4DN2/HSPDE4D	T/C	-0.0098	0.5	0.99
rs6888159	5:63932234	RGS7BP/R7BP	C/G	0.0114	0.33	0.99
rs710355	5:87159003	TMEM161B/FLB3342/PRO1313	C/G	-0.0068	0.04	0.98
rs7444298	5:87730027		A/G	0.0179	0.26	1
rs7710595	5:106506697	EFNA5/EPLG7/RAGS/GLC1M/EFL5/LERK7/AF1	A/C	0.0101	0.46	1
rs7711753	5:122733317	CEP120/JBTS31/SRTD13/CCDC100	A/G	-0.0134	0.43	0.98
rs7715256	5:153537893	GALNT10/GALNACT10/PPGALNACT10/PPGANTASE10	T/G	-0.0166	0.44	1
rs7716275	5:137631073	CDC25C/PPP1R60/CDC25	T/G	-0.0132	0.19	1
rs7727781	5:165185571		T/C	0.0097	0.48	1
rs7730004	5:43191033		T/C	0.0148	0.31	1
rs7730898	5:170459675	RANBP17	A/G	0.0168	0.26	1
rs1020548	6:56810539	BEND6/C6orf65	A/G	-0.0132	0.19	1
rs10456637	6:50763935	TFAP2B/PDA2/AP2-B/AP-2B	A/T	0.0134	0.24	0.93
rs10499276	6:154309808	OPRM1/MOP/OPRM/MOR/LMOR/MOR1/M-OR-1	T/C	0.0172	0.12	1
rs11753081	6:20705590	CDKAL1	T/G	0.0138	0.2	1
rs11756653	6:50054296	DEFB112/DEFB-12	C/G	-0.0046	0.08	0.88
rs12215331	6:34644749	C6orf106/C6orf106/FP852/dJ391O22.4	T/C	0.0177	0.17	1
rs13191362	6:163033350	PARK2/PARK2/LPRS2/PDJ/AR-JP	A/G	0.0236	0.11	0.98
rs13201877	6:137675541	IFNGR1/IMD27B/IMD27A/IFNGR/CD119	A/G	-0.0152	0.13	0.97
rs13203153	6:97374850	KLHL32/dJ21F7.1/KIAA1900/BKLHD5/UG0030H05	A/G	-0.012	0.19	0.99
rs13203286	6:49837540	CRISP1/ARP/HEL-S-57/HSCRISP1G/HSCRISP1D/AEGL1/HUMARP/CRISP-1	T/G	-0.005	0.06	1
rs13209753	6:86354442	SYNCRIP/HNRPQ1/HNRNPQ/hnRNP-Q/PP68/GRYRBP/GRY-RBP/NSAP1	A/G	-0.0182	0.04	0.82
rs13209872	6:97753223	MIR548H3/MIRN548H3/MIR548H-3/hsa-mir-548h-3	C/G	-0.0152	0.33	0.93
rs13209968	6:126089285	HEY2/HRT2/HERP1/HESR2/bHLHb32/GRIDLOCK/GRL/CHF1	C/G	0.0114	0.49	0.99
rs1324110	6:93913200	EPHA7/EK11/EHK-3/HEK11/EHK3	C/G	-0.0103	0.44	0.97
rs1358808	6:51825285	PKHD1/TIGM1/ARPKD/FCYT/FPC/PKD4	C/G	-0.0142	0.33	0.92
rs1475774	6:35619554	FKBP5/Ptg-10/FKBP51/FKBP54/PPIase/P54/AIG6	A/G	0.0257	0.02	0.98
rs1503139	6:54724405	FAM83B/C6orf143	A/G	-0.0059	0.35	0.99
rs156151	6:104799007	HACE1/SPPRS	C/G	-0.0165	0.18	1
rs17542466	6:35614744	FKBP5/Ptg-10/FKBP51/FKBP54/PPIase/P54/AIG6	A/G	0.0053	0.19	0.98
rs17739298	6:27293049	FKSG83/FKSG83/hs6V1-1p/b24o18.2/VNR6I1P	C/G	0.0101	0.13	0.98
rs17757975	6:38214150	BTBD9/dJ322I12.1	T/C	0.0143	0.14	1
rs1853639	6:87606842	HTR1E/5-HT1E	A/G	-0.0111	0.37	0.95
rs2033529	6:40348653	TDRG1/lincRNA-NR_024015/LINC00532	A/G	-0.0205	0.28	1
rs2140418	6:34975415	ANKS1A/ANKS1	T/C	0.0107	0.21	1
rs2185027	6:153381622	RGS17/RGSZ2/hRGS17/RGS-17	A/C	-0.0135	0.3	1
rs2228213	6:12124855	HIVEP1/ZNF40A/Schnurri-1/GAAP/MBP-1/ZNF40/CIRIP/CRYBP1/ZAS1/PRDII-BF1	A/G	-0.0139	0.38	1
rs2252300	6:51096424	TFAP2B/PDA2/AP2-B/AP-2B	A/T	-0.0052	0.23	0.95
rs2295896	6:50566383	TFAP2D/TFAP2BL1	A/G	-0.0021	0.19	0.98
rs2357760	6:120213880		A/G	0.0145	0.34	1
rs2397061	6:51638877	PKHD1/TIGM1/ARPKD/FCYT/FPC/PKD4	T/C	-0.0094	0.09	0.99
rs2504674	6:51160682	PKHD1/TIGM1/ARPKD/FCYT/FPC/PKD4	C/G	-0.0112	0.45	0.99
rs2635727	6:50820940	TFAP2B/PDA2/AP2-B/AP-2B	T/C	-0.028	0.28	1
rs2653365	6:55169801	HCRTR2/OX2R	T/C	-0.0119	0.15	1
rs2781668	6:131897278	ARG1	T/C	0.0169	0.14	0.99
rs2842385	6:19078274		A/G	-0.012	0.19	1
rs2875762	6:124925032	NKAIN2/TCBA/TCBA1/NKAIP2/FAM77B	C/G	0.0139	0.27	0.96
rs3734572	6:28059458	ZSCAN12P1/ZNF305P1/ZNF96P1/ZNF96L1/ZNF187p1/ZSCAN12L1/dJ313I6.7	T/C	-0.0166	0.04	0.96
rs3800229	6:108996963	FOXO3/FKHRL1/FOXO2/AF6q21/FKHRL1P2/FOXO3A	T/G	0.0175	0.33	1
rs3807049	6:35512955	FKBP5/Ptg-10/FKBP51/FKBP54/PPIase/P54/AIG6	T/C	-0.0035	0.27	0.99
rs3819299	6:31322367	HLA-B/HLAB/AS/B-4901	T/G	0.0187	0.09	0.75
rs419261	6:33554147	C6orf227/NCRNA00336/C6orf227	T/C	0.0106	0.38	1
rs4278019	6:53693410	LRRC1/LANO/dJ523E19.1	A/T	0.0112	0.3	0.99
rs4339513	6:57964315	GUSBP4/SMA3-L/GUSBL2/C6orf216/SMAC3L	T/C	-0.0015	0.12	0.94
rs487060	6:160774459	SLC22A3/EMT/EMTH/OCT3	T/C	0.011	0.49	1
rs498240	6:31892592	C2/CO2/ARMD14	A/G	-0.0267	0.06	1
rs6459326	6:58060143	GUSBP4/SMA3-L/GUSBL2/C6orf216/SMAC3L	C/G	0.0008	0.17	0.95
rs6569648	6:130349119	L3MBTL3/MBT-1/MBT1	T/C	-0.0126	0.23	1
rs6900723	6:23876240	NRSN1/p24/VMP	T/C	-0.0112	0.32	1
rs6908295	6:27527205	ZNF184/kr-ZNF3	A/C	-0.0058	0.21	1
rs6919443	6:104493098		A/G	-0.0096	0.43	1
rs6921533	6:73742334	KCNQ5/Kv7.5/MRD46	T/C	0.0118	0.3	0.99
rs6922214	6:69968484	BAI3/BAI3	A/G	-0.0123	0.15	1
rs6922855	6:51843542	PKHD1/TIGM1/ARPKD/FCYT/FPC/PKD4	A/G	0.0004	0.49	0.99
rs6938239	6:34683635	C6orf106/C6orf106/FP852/dJ391O22.4	A/G	-0.0271	0.14	0.99
rs760880	6:27408181	ZNF184/kr-ZNF3	T/G	-0.0027	0.34	1
rs765332	6:51874745	PKHD1/TIGM1/ARPKD/FCYT/FPC/PKD4	T/G	-0.0118	0.09	0.83
rs7748777	6:41133806	TREM2/Trem2c/Trem2a/PLOSL2/TREM-2/Trem2b	A/G	0.0105	0.49	1
rs7760082	6:21919387		A/G	-0.0122	0.33	0.99
rs816364	6:53990465	C6orf142/C6orf142/CIP	A/G	-0.01	0.34	1
rs820077	6:35033854	ANKS1A/ANKS1	A/G	-0.0064	0.2	1
rs847747	6:40080069	MOCS1/MOCS1B/MOCS1A/MOCOD/MIG11	T/G	-0.0113	0.3	0.99
rs901630	6:98539519	MIR2113/hsa-mir-2113	T/C	-0.0146	0.4	0.96
rs926279	6:58298846	GUSBP4/SMA3-L/GUSBL2/C6orf216/SMAC3L	A/G	-0.0036	0.3	0.94
rs9294260	6:83433228	UBE2CBP/UBE2CBP/H10BH/YJR141W/C6orf157	A/G	0.0147	0.46	0.99
rs9349239	6:42676480	PRPH2/AOFMD/MDBS1/RDS/RP7/rd2/CACD2/PRPH/AVMD/TSPAN22/DS	A/G	0.0122	0.49	1
rs9362662	6:90296588	ANKRD6	A/G	0.0112	0.49	1
rs9367368	6:13189275	PHACTR1/EIEE70/RPEL/dJ257A7.2/RPEL1	T/C	0.0121	0.29	0.99
rs9370042	6:51546123	PKHD1/TIGM1/ARPKD/FCYT/FPC/PKD4	C/G	0.0038	0.1	0.96
rs9394312	6:35672330	FKBP5/Ptg-10/FKBP51/FKBP54/PPIase/P54/AIG6	C/G	0.0109	0.49	0.98
rs9396763	6:9952059	TFAP2A/BOFS/TFAP2/AP-2/AP2TF/AP-2alpha	A/C	0.0089	0.23	0.98
rs9460306	6:19211776		T/C	0.0136	0.1	1
rs9463175	6:9510030		T/C	-0.0108	0.35	0.99
rs9470086	6:35709678	C6orf81/C6orf81	A/C	0.0243	0.01	0.88
rs9475173	6:55013291	HCRTR2/OX2R	A/G	0.0108	0.35	0.95
rs9688431	6:73922654	KHDC1L	T/C	0.0231	0.07	0.99
rs987237	6:50803050	TFAP2B/PDA2/AP2-B/AP-2B	A/G	-0.0409	0.18	1
rs998584	6:43757896	VEGFA/MVCD1/VPF/VEGF	A/C	-0.0131	0.5	0.95
rs10268050	7:44522617	NUDCD3/NudCL	T/C	-0.0113	0.19	0.99
rs10269783	7:49616203	VWC2/PSST739/UNQ739	A/G	0.0133	0.38	0.99
rs10275044	7:1273845	UNCX/UNCX4.1	A/T	-0.0129	0.22	1
rs1035010	7:69598328	AUTS2/MRD26/FBRSL2	T/C	0.0139	0.27	1
rs1048365	7:100804430	AP1S1/CLAPS1/EKV3/SIGMA1A/AP19/MEDNIK	T/C	0.0136	0.17	0.96
rs10953620	7:109173373	EIF3IP1/RG208K23	A/C	-0.0101	0.48	0.97
rs11496125	7:103417557	RELN/RL/LIS2/ETL7/PRO1598	T/C	0.0169	0.41	1
rs11773362	7:147668180	CNTNAP2/CDFE/NRXN4/PTHSL1/AUTS15/CASPR2	T/C	-0.0111	0.3	1
rs11971041	7:26698848	SKAP2/SCAP2/PRAP/RA70/SKAP55R/SKAP-HOM/SAPS	A/G	-0.021	0.1	1
rs1229057	7:39054538	POU6F2/WTSL/WT5/RPF-1	T/C	0.017	0.11	0.98
rs12666574	7:26526960	LOC441204	A/G	0.0097	0.4	1
rs12705987	7:114349212	FOXP2/TNRC10/CAGH44/SPCH1	A/T	0.0135	0.38	1
rs13227433	7:74094721	GTF2I/BTKAP1/IB291/TFII-I/WBS/BAP135/WBSCR6/GTFII-I/SPIN/DIWS	T/G	-0.0156	0.26	0.99
rs13227658	7:113353254	PPP1R3A/PP1G/GM/PPP1R3	T/C	-0.0157	0.47	0.99
rs13240600	7:99064466	ATP5J2/ATP5J2/ATP5JL	A/G	0.0204	0.16	0.98
rs13247665	7:93232057	CALCR/CT-R/CTR1/CTR/CRT	T/C	-0.0139	0.35	0.95
rs1544459	7:77417584	TMEM60/C7orf35/DC32	T/C	-0.0103	0.47	1
rs1593304	7:131619847	PLXNA4/PLEXA4/FAYV2820/PLXNA4A/PLXNA4B/PRO34003	A/G	0.0126	0.21	1
rs17207196	7:75101065	POM121C/POM121-2	T/C	-0.0221	0.42	0.64
rs1814170	7:138794149	ZC3HAV1/ZC3H2/PARP13/ARTD13/ZC3HDC2/FLB6421/ZAP	A/T	0.0203	0.1	0.99
rs1852006	7:77829768	MAGI2/AIP-1/NPHS15/ACVRIP1/SSCAM/ARIP1/MAGI-2/AIP1	A/G	-0.0156	0.34	1
rs1899689	7:121964349	CADPS2/CAPS2	T/C	0.0117	0.41	1
rs2283093	7:126721231	GRM8/GPRC1H/GLUR8/mGlu8/MGLUR8	T/C	0.0127	0.23	1
rs329277	7:35080931	DPY19L1	T/G	-0.0099	0.46	0.98
rs3800649	7:137424509	DGKI/DGK-IOTA	A/G	0.0122	0.26	0.93
rs3807566	7:50564204	DDC/AADC	T/G	-0.0127	0.46	1
rs40245	7:21470536	SP4/SPR-1/HF1B	A/T	0.011	0.34	0.99
rs411717	7:94033031	COL1A2/EDSARTH2/OI4/EDSCV	T/C	-0.0069	0.46	1
rs4307239	7:24354300	NPY/PYY4	A/G	-0.0115	0.48	0.97
rs4718966	7:70040558	AUTS2/MRD26/FBRSL2	T/C	0.0127	0.41	1
rs4722398	7:3125220	CARD11/BIMP3/BENTA/PPBL/IMD11A/IMD11/CARMA1	T/C	0.0158	0.13	0.99
rs4722672	7:27231762	HOXA11-AS1/HOXA-AS5/HOXA11AS/HOXA11S/HOXA11-AS1/NCRNA00076	T/C	-0.0151	0.18	0.99
rs4725984	7:150668514	KCNH2/Kv11.1/ERG-1/ERG1/HERG1/HERG/SQT1/H-ERG/LQT2	T/C	-0.0128	0.4	0.97
rs6461115	7:2103668	MAD1L1/PIG9/TP53I9/TXBP181/MAD1	A/G	0.0144	0.26	0.97
rs6463489	7:5542513	FBXL18/Fbl18	T/C	0.0157	0.09	0.99
rs6963840	7:78144371	MAGI2/AIP-1/NPHS15/ACVRIP1/SSCAM/ARIP1/MAGI-2/AIP1	T/C	0.0154	0.14	0.99
rs6968554	7:17287106	AHR/bHLHe76/RP85	A/G	-0.01	0.39	1
rs740157	7:77055885	PION/PION	A/G	0.0116	0.44	1
rs7777102	7:73058017	MLXIPL/MIO/WS-bHLH/MONDOB/CHREBP/MLX/bHLHd14/WBSCR14	A/G	-0.0126	0.12	0.88
rs7779498	7:130408415	KLF14/BTEB5	T/C	-0.0249	0.04	0.95
rs7784465	7:6418275	RAC1/Rac-1/MRD48/p21-Rac1/TC-25/MIG5	T/C	-0.0164	0.13	1
rs7796608	7:897847	SUN1/UNC84A	A/G	0.0124	0.16	0.99
rs7805441	7:78121458	MAGI2/AIP-1/NPHS15/ACVRIP1/SSCAM/ARIP1/MAGI-2/AIP1	T/C	0.0109	0.5	1
rs799449	7:44784697	ZMIZ2/NET27/ZIMP7/TRAFIP20/hZIMP7	T/C	0.013	0.45	1
rs849135	7:28196413	JAZF1/ZNF802/TIP27	A/G	0.0109	0.5	0.99
rs874454	7:131896813	PLXNA4/PLEXA4/FAYV2820/PLXNA4A/PLXNA4B/PRO34003	A/G	-0.0081	0.34	0.99
rs972283	7:130466854	KLF14/BTEB5	A/G	0.0096	0.45	0.98
rs993931	7:71888157	CALN1/CABP8	A/G	-0.0057	0.39	1
rs10110727	8:14324437	SGCZ/ZSG1	A/G	0.0135	0.28	1
rs10955841	8:118946541	EXT1/LGCR/LGS/EXT/TRPS2/TTV	A/G	0.0096	0.3	1
rs11781222	8:23389571	SLC25A37/MFRN1/PRO1278/MSCP/PRO2217/HT015/PRO1584/MFRN/MSC	T/C	0.0158	0.15	0.97
rs11781699	8:118863061	EXT1/LGCR/LGS/EXT/TRPS2/TTV	T/C	-0.0132	0.19	0.97
rs11987383	8:15197115	SGCZ/ZSG1	A/C	-0.0147	0.14	1
rs12458	8:11617240	GATA4/VSD1/ASD2/TOF/TACHD	A/T	0.0015	0.33	1
rs12675063	8:132879047	EFR3A	A/T	-0.0156	0.11	0.99
rs12682565	8:10626280	PINX1/LPTL/Pxr1/LPTS/Gno1	A/G	0.0232	0.04	0.95
rs13263601	8:14095900	SGCZ/ZSG1	A/C	-0.0154	0.36	1
rs1362910	8:30856464	PURG/PURG-A/PURG-B/PURGA/PURGB	A/G	0.0121	0.41	1
rs1399054	8:9785503	MIR124-1/mir-124-1/MIRN124A1/MIR124A/MIR124A1/MIRN124-1	A/G	-0.0101	0.2	1
rs1405348	8:77228222		A/G	-0.0204	0.45	1
rs1431659	8:73439070	KCNB2/KV2.2	A/G	0.0196	0.26	1
rs1594830	8:26334167	PNMA2/MA2/RGAG2/MM2	C/G	-0.0112	0.19	1
rs1658820	8:4288577	CSMD1/PPP1R24	T/G	0.0141	0.25	0.99
rs16906845	8:138215228		A/G	-0.0225	0.07	0.97
rs16907751	8:81375457	ZBTB10/RINZF	T/C	-0.0209	0.12	0.97
rs16932761	8:67202787	CRH/CRF/CRH1	A/G	-0.014	0.25	1
rs1700137	8:89461609	MMP16/C8orf57/MT-MMP2/MMP-X2/MT3-MMP/MT-MMP3	T/C	-0.0121	0.34	1
rs17069831	8:4137396	CSMD1/PPP1R24	T/C	-0.0109	0.26	1
rs17446091	8:27167942	TRIM35/HLS5/MAIR	T/C	-0.0123	0.26	1
rs1982441	8:28021769	ELP3/KAT9	T/G	0.0175	0.16	0.99
rs2100814	8:28118130	PNOC/PPNOC/ppN/OFQ/OFQ/NOP/N/OFQ	A/G	0.0113	0.4	1
rs2170382	8:74689288	UBE2W/UBC16/UBC-16	T/C	0.0172	0.11	0.97
rs2409730	8:11060638	XKR6/XRG6/C8orf21/C8orf7/C8orf5	A/C	-0.0093	0.35	1
rs2543132	8:15536311	TUSC3/M33/MRT22/OST3A/MRT7/MagT2/D8S1992/N33	C/G	0.0146	0.23	0.99
rs2634047	8:85696337	RALYL/HNRPCL3	C/G	-0.0149	0.25	0.98
rs2721965	8:116662038	TRPS1/LGCR/GC79	A/C	0.0171	0.32	1
rs3134353	8:101947453	YWHAZ/HEL4/HEL-S-93/14-3-3-zeta/KCIP-1/HEL-S-3/YWHAD	A/T	-0.0125	0.39	0.99
rs3808434	8:116559435	TRPS1/LGCR/GC79	A/G	0.011	0.42	0.99
rs4076358	8:144910239	PUF60/FIR/VRJS/RoBPI/SIAHBP1	A/G	0.0092	0.37	1
rs4366093	8:20639811		T/C	-0.0121	0.3	0.99
rs4737183	8:64720693		A/G	0.0112	0.44	1
rs4841659	8:11828200	DEFB136/DEFB137	T/C	0.0149	0.49	0.97
rs497417	8:9790041	MIR124-1/mir-124-1/MIRN124A1/MIR124A/MIR124A1/MIRN124-1	A/T	-0.0052	0.21	1
rs7006629	8:87519542	FAM82B/CGI-90/RMD1/RMD-1/FAM82B	T/C	0.0109	0.48	1
rs733594	8:85077686	RALYL/HNRPCL3	T/C	0.0138	0.28	0.99
rs7844647	8:34503776		T/C	0.0123	0.26	1
rs881301	8:38332318	FGFR1/HBGFR/HH2/FLT-2/FGFR-1/HRTFDS/FGFBR/CEK/BFGFR/N-SAM/KAL2/bFGF-R-1/CD331/OGD/FLT2/ECCL/FLG	T/C	-0.0097	0.41	1
rs903959	8:142630782		A/T	0.0106	0.39	0.99
rs9657542	8:10864363	XKR6/XRG6/C8orf21/C8orf7/C8orf5	C/G	-0.0048	0.37	0.99
rs10118701	9:103061366	INVS/NPHP2/INV/NPH2	A/G	-0.0163	0.35	0.99
rs10797115	9:92191256	GADD45G/GRP17/DDIT2/CR6/GADD45gamma	T/C	0.0124	0.45	1
rs10818810	9:126096522	CRB2/FSGS9/VMCKD	A/G	0.0126	0.39	1
rs10818938	9:127049237	NEK6/SID6-1512	A/G	0.0114	0.42	1
rs10867256	9:81367391	PSAT1/EPIP/PSAT/PSA/NLS2/PSATD	T/C	-0.0118	0.46	0.99
rs10962549	9:16719445	BNC2/BSN2	T/C	0.0198	0.17	1
rs10971712	9:33820938	UBE2R2/UBC3B/E2-CDC34B/CDC34B	T/C	-0.0197	0.09	1
rs10989568	9:104396304	GRIN3A/NMDAR-L/GluN3A/NR3A	A/G	0.0107	0.47	1
rs11790280	9:14651283	ZDHHC21/DHHC-21/DNZ1/DHHC21/HSPC097	T/C	-0.0103	0.37	1
rs11792069	9:140646121	EHMT1/KMT1D/GLP1/FP13812/KLEFS1/Eu-HMTase1/EHMT1-IT1/EUHMTASE1/GLP	A/G	0.0145	0.14	0.87
rs13290794	9:37183628	ZCCHC7/AIR1/HSPC086	A/G	-0.0141	0.39	1
rs13292976	9:129467340	LMX1B/NPS1/LMX1.2	T/C	0.0131	0.45	1
rs1412235	9:28410996	LINGO2/LERN3/LRRN6C	C/G	0.0246	0.28	1
rs17351791	9:83263089		A/C	0.0097	0.32	1
rs17820822	9:11831420		T/G	0.0143	0.37	1
rs1865341	9:8845911	PTPRD/HPTP/RPTPDELTA/PTPD/HPTPD/HPTPDELTA	T/C	0.0128	0.21	1
rs1928295	9:120378483	TLR4/TLR-4/ARMD10/CD284/TOLL	T/C	0.0141	0.44	1
rs2174307	9:73791849	TRPM3/GON-2/LTRPC3/MLSN2	C/G	0.0121	0.39	0.99
rs3739555	9:129940416	RALGPS1/RALGEF2/RALGPS1A	T/G	0.011	0.18	0.96
rs3739733	9:88897891	ISCA1/HBLD2/hIscA/ISA1/MMDS5	A/G	0.0132	0.2	1
rs3829849	9:129390800	LMX1B/NPS1/LMX1.2	T/C	0.0098	0.37	1
rs3902840	9:129419025	LMX1B/NPS1/LMX1.2	A/G	0.0222	0.07	1
rs450231	9:101481205	GABBR2/EIEE59/HRIHFB2099/GPRC3B/GPR51/GABABR2/HG20/NDPLHS	A/G	-0.0127	0.25	0.98
rs4740383	9:133783566	FIBCD1	A/G	0.0126	0.4	0.99
rs4744275	9:96482633	PHF2/CENP-35/GRC5/KDM7C/JHDM1E	A/G	0.0144	0.27	0.99
rs483752	9:27612918	C9orf72/ALSFTD/DENNL72/FTDALS/FTDALS1	T/C	0.0121	0.25	0.85
rs6474945	9:15670492	C9orf93/bA778P13.1/bA536D16.1/C9orf93	T/G	-0.0186	0.45	1
rs6477694	9:111932342	EPB41L4B/CG1/EHM2	T/C	-0.0123	0.33	0.99
rs7042372	9:6959840	KDM4C/JMJD2C/TDRD14C/GASC1/JHDM3C	A/G	0.0122	0.34	0.97
rs7865157	9:122631560	MIR147/hsa-mir-147a/MIR147/MIRN147	T/C	0.0177	0.1	0.99
rs7869771	9:94180627	NFIL3/NFIL3A/E4BP4/NF-IL3A/IL3BP1	A/C	0.014	0.27	1
rs7871866	9:131027982	GOLGA2/GM130	C/G	0.0187	0.14	0.97
rs7874154	9:27777012	LINGO2/LERN3/LRRN6C	T/C	-0.0127	0.5	0.99
rs10883553	10:102635475	FAM178A/C10orf6/FAM178A	A/C	0.0119	0.45	0.94
rs10883759	10:104412049	TRIM8/GERP/RNF27	A/G	-0.0122	0.3	1
rs10886017	10:118672531	KIAA1598/KIAA1598/shootin-1	A/C	0.0152	0.26	0.98
rs10887578	10:88096047	GRID1/GluD1	C/G	0.0128	0.49	0.95
rs11251352	10:2585792		A/G	-0.0109	0.41	0.99
rs12098284	10:76047464	ADK/AK	T/C	0.0178	0.13	0.97
rs12411886	10:104685299	CNNM2/HOMGSMR/ACDP2/HOMG6	A/C	0.0271	0.1	1
rs12776880	10:19776828	PLXDC2/TEM7R	A/T	0.0128	0.28	0.99
rs17094222	10:102395440	HIF1AN/FIH1	T/C	-0.0181	0.19	0.98
rs1712517	10:105033015	INA/NEF5/NF-66/TXBP-1	T/C	-0.0028	0.49	1
rs17636031	10:126594078	ZRANB1/TRABID	T/C	-0.016	0.27	0.71
rs1937684	10:53680085	PRKG1/cGKI-BETA/cGK/AAT8/PRKG1B/cGKI/PRKGR1B/PKG/cGK1/PKG1/cGKI-alpha	A/T	0.0112	0.33	1
rs1983864	10:100017453	LOXL4/LOXC	T/G	0.0158	0.36	1
rs2163188	10:65314711	REEP3/C10orf74/Yip2b	C/G	0.0131	0.47	0.99
rs2631681	10:93032943	PCGF5/RNF159	T/C	-0.0113	0.37	1
rs3781099	10:27318776	ANKRD26/THC2/bA145E8.1	T/C	0.021	0.09	1
rs3851083	10:33862727	NRP1/VEGF165R/NRP/NP1/CD304/BDCA4	A/G	-0.0102	0.46	0.99
rs577525	10:99769388	CRTAC1/LOTUS/CEP-68/CEP68/ASPIC/ASPIC1	T/C	-0.0166	0.45	1
rs7083450	10:103984060	ELOVL3/CIG-30/CIG30	T/C	0.0159	0.17	1
rs7084454	10:21821274	MLLT10/AF10	A/G	0.0193	0.33	0.98
rs7893571	10:16750129	RSU1/RSP-1	T/G	0.0136	0.33	0.99
rs7899106	10:87410904	GRID1/GluD1	A/G	-0.0331	0.05	0.98
rs7903146	10:114758349	TCF7L2/TCF4/TCF-4	T/C	-0.0181	0.33	1
rs793520	10:99032375	ARHGAP19	A/G	0.0105	0.32	1
rs845084	10:125220036	GPR26	A/G	0.014	0.29	1
rs9419958	10:105675946	OBFC1/RPA-32/OBFC1/AAF-44/bA541N10.2/AAF44	T/C	-0.0126	0.16	1
rs9787495	10:103206115	BTRC/bTrCP1/betaTrCP/BETA-TRCP/FBW1A/FBXW1A/FWD1/bTrCP/FBXW1	A/G	-0.0103	0.45	0.98
rs1003081	11:118913993	HYOU1/GRP-170/IMD59/Grp170/ORP150/HSP12A/ORP-150	T/C	0.0121	0.44	1
rs1037587	11:11796727	USP47/TRFP	T/C	0.0106	0.42	1
rs10459012	11:55091574	OR4A16/OR11-117/OR4A16Q	A/C	0.0084	0.21	1
rs1048932	11:115044850	CADM1/IGSF4A/synCAM1/NECL2/RA175/IGSF4/Necl-2/sTSLC-1/BL2/ST17/TSLC1/sgIGSF/SYNCAM	A/C	-0.016	0.41	1
rs10769165	11:45706453	CHST1/KS6ST/GST-1/C6ST/KSGal6ST/KSST	T/C	-0.0067	0.49	0.91
rs10830452	11:89966202	CHORDC1/CHP1	A/G	-0.0111	0.36	1
rs10832778	11:17394073	DKFZp686O24166/DKFZp686O24166/B7H6/B7-H6	C/G	-0.0125	0.38	1
rs10838122	11:43551416	MIR670/hsa-mir-670	T/C	-0.0105	0.47	0.99
rs10840606	11:2234690	TH/DYT14/DYT5b/TYH	A/G	-0.0164	0.17	0.99
rs11030385	11:28629115	METTL15/METT5D1	A/G	-0.0084	0.4	1
rs11039014	11:46895378	LRP4/LRP-4/LRP10/SOST2/CLSS/CMS17/MEGF7	A/G	0.0004	0.22	1
rs11600990	11:64082807	ESRRA/ERR1/ERRalpha/ERRa/ESRL1/NR3B1	T/C	-0.0178	0.17	1
rs12364470	11:134601012	LOC283177	T/G	-0.0178	0.15	0.97
rs12417072	11:115623272		A/G	-0.0151	0.1	0.98
rs12420725	11:117017530	PAFAH1B2/HEL-S-303	A/G	-0.0226	0.06	0.99
rs12575252	11:8694073	RPL27A/L27A	C/G	-0.0182	0.38	1
rs12577642	11:43728534	HSD17B12/KAR/SDR12C1	A/T	-0.0213	0.3	0.99
rs1452134	11:86133416	CCDC81	T/C	-0.0091	0.48	1
rs1473579	11:48901553	FOLH1/FGCP/GCP2/PSM/PSMA/FOLH/GCPII/NAALAdase/NAALAD1/mGCP	A/G	-0.0026	0.46	0.57
rs1552717	11:29158495		A/T	0.0149	0.14	1
rs1625427	11:131957293	NTM/IGLON2/CEPU-1/HNT/NTRI	T/C	0.013	0.33	0.99
rs17197116	11:46520302	AMBRA1/DCAF3/WDR94	T/C	-0.0052	0.08	0.99
rs1782507	11:30243868	FSHB/HH24	T/G	-0.0135	0.34	1
rs1789165	11:69481969	ORAOV1/ORAOV1/TAOS1/CIAB1	A/G	0.0138	0.38	0.96
rs223051	11:32131303	RCN1/RCN/HEL-S-84/RCAL/PIG20	T/C	0.0112	0.3	0.99
rs2440885	11:70563286	SHANK2/SHANK/ProSAP1/CORTBP1/CTTNBP1/SPANK-3/AUTS17	A/G	0.0091	0.45	1
rs2605603	11:93221105	C11orf75/FN5/C11orf75	A/G	-0.0103	0.49	1
rs3134438	11:122765667	C11orf63/C11orf63	A/C	0.0113	0.28	0.96
rs329651	11:133767622		T/G	0.0164	0.22	0.95
rs3802924	11:133827733	IGSF9B	A/C	0.0085	0.2	1
rs4542429	11:56446833	OR8U8	T/C	-0.0064	0.48	1
rs4936175	11:132641959	OPCML/OBCAM/OPCM/IGLON1	T/C	-0.0122	0.42	1
rs4936671	11:121942512	MIR100HG/AGD1/lncRNA-N2/linc-NeD125	C/G	0.0105	0.39	1
rs4939051	11:56206141	OR8U8	C/G	-0.0014	0.23	0.99
rs524281	11:65886662	PACS1/MRD17/SHMS	A/C	-0.0093	0.23	1
rs573455	11:117267884	CEP164/NPHP15	A/G	-0.0093	0.45	0.97
rs587230	11:69299771	CCND1/D11S287E/BCL1/U21B31/PRAD1	A/G	0.0149	0.15	1
rs7102454	11:65594820	SNX32/SNX6B	T/C	-0.0158	0.34	0.98
rs7117238	11:78040259	GAB2	A/G	-0.0131	0.17	0.98
rs7120873	11:49459474	LOC440040	T/C	0.0172	0.09	0.97
rs7122539	11:66662731	PC/PCB	A/G	-0.0065	0.34	1
rs7123876	11:72444583	ARAP1/CENTD2	T/C	-0.0119	0.21	1
rs7124442	11:27677041	BDNF/BULN2/ANON2	T/C	-0.0286	0.29	1
rs7131262	11:47836302	NUP160/NPHS19	A/T	-0.0216	0.32	0.92
rs719802	11:113234679	TTC12/TPARM	T/C	0.0101	0.37	1
rs7478904	11:48630323	OR4A47/OR11-113	T/C	-0.0086	0.1	0.77
rs7924371	11:49620595	LOC440040	T/C	-0.004	0.42	0.96
rs7941030	11:122522375	UBASH3B/TULA-2/STS1/TULA2/p70/STS-1	T/C	-0.0112	0.37	1
rs7948120	11:28763321	METTL15/METT5D1	T/C	-0.0132	0.26	0.95
rs900144	11:13294268	ARNTL/BMAL1/MOP3/JAP3/bHLHe5/PASD3/BMAL1c/TIC	T/C	0.0166	0.44	0.98
rs9332817	11:118365210	MLL/TRX1/HRX/MLL1A/MLL/MLL1/CXXC7/HTRX1/WDSTS/ALL-1	C/G	-0.0382	0.03	0.66
rs10744146	12:17212881		A/G	-0.0122	0.5	1
rs10745785	12:97586257	NEDD1/GCP-WD/TUBGCP7	T/C	-0.0111	0.32	1
rs10772055	12:33379440	SYT10	C/G	-0.0172	0.13	1
rs10773049	12:124506631		T/C	-0.0116	0.41	1
rs10840674	12:17360254		A/G	-0.0089	0.28	0.99
rs10842240	12:24060075	SOX5/L-SOX5B/L-SOX5/LAMSHF/L-SOX5F	C/G	0.0218	0.14	0.99
rs10876418	12:39428802	CPNE8	T/C	-0.0123	0.26	1
rs10878946	12:69642315	CPSF6/CFIM72/CFIM68/HPBRII-7/CFIM/HPBRII-4	T/C	-0.0141	0.32	0.99
rs11066301	12:112871372	PTPN11/BPTP3/METCDS/PTP2C/PTP-1D/CFC/JMML/NS1/SH-PTP2/SH-PTP3/SHP2	A/G	0.0114	0.46	0.98
rs11115176	12:82465797	CCDC59/HSPC128/BR22/TAP26	T/C	0.0121	0.24	1
rs11172702	12:39982413	ABCD2/ALDL1/hALDR/ALDR/ALDRP/ABC39	A/G	0.0144	0.08	0.99
rs11611246	12:939480	WNK1/PSK/p65/PRKWNK1/PPP1R167/HSN2/KDP/HSAN2	T/G	0.024	0.18	0.93
rs11611496	12:108413828	WSCD2	A/G	-0.0169	0.22	0.99
rs12306932	12:38242029	ALG10B/ALG10/KCR1	T/C	-0.0008	0.48	0.98
rs12422552	12:14413931	ATF7IP/ATF-IP/MCAF1/AM/MCAF/p621	C/G	-0.0134	0.28	0.98
rs1558236	12:111780998	CUX2/CDP2/CUTL2/EIEE67	C/G	-0.0079	0.03	0.99
rs17096549	12:38529333	ALG10B/ALG10/KCR1	A/G	0.0205	0.02	0.98
rs17608150	12:110046698	MVK/MVLK/LRBP/POROK3/MK	T/C	0.0196	0.06	0.98
rs1819844	12:68205604	DYRK2	A/G	0.0143	0.18	0.99
rs2240108	12:48180508	HDAC7/HD7/HD7A/HDAC7A	T/C	-0.0127	0.16	1
rs2429150	12:2152655	CACNA1C/CCHL1A1/CaV1.2/CACN2/CACNL1A1/TS/CACH2/LQT8	A/C	-0.0111	0.44	0.99
rs2467110	12:23067302	ETNK1/EKI1/Nbla10396/EKI	T/C	-0.0099	0.27	1
rs2731222	12:90595383		A/C	0.0131	0.29	1
rs2733287	12:41880909	PDZRN4/LNX4/SAMCAP3L	A/C	-0.0157	0.48	0.99
rs3809272	12:111800258	FAM109A/SES1/FAM109A/IPIP27A	A/G	0.0062	0.28	0.89
rs3887080	12:121661966	P2RX4/P2X4/P2X4R	A/G	0.0181	0.12	1
rs4077093	12:51593616	POU6F1/MPOU/TCFB1/BRN5	T/G	0.0128	0.21	0.96
rs4759073	12:54653258	CBX5/HEL25/HP1/HP1A	A/G	-0.0116	0.36	0.99
rs4759228	12:56508409	PA2G4/EBP1/p38-2G4/HG4-1	C/G	-0.0157	0.27	0.86
rs4764949	12:103658096	C12orf42	A/G	0.0184	0.35	0.98
rs4766710	12:114437708	RBM19/Mrd1	A/G	0.0229	0.05	1
rs621042	12:18789007	PIK3C2G/PI3K-C2GAMMA/PI3K-C2-gamma	A/C	-0.0107	0.45	0.99
rs6490055	12:111768973	CUX2/CDP2/CUTL2/EIEE67	A/G	-0.0072	0.23	0.94
rs651548	12:99560183	ANKS1B/AIDA/EB-1/ANKS2/cajalin-2/EB1/AIDA-1	A/G	0.0139	0.4	0.98
rs6606686	12:110903380	GPN3/ATPBD1C	C/G	-0.0136	0.3	0.99
rs7133378	12:124409502	DNAH10	A/G	0.0125	0.35	0.97
rs7134375	12:20473758	PDE3A/HTNB/CGI-PDE/CGI-PDEA/CGI-PDE-A	A/C	0.0077	0.42	1
rs7138803	12:50247468	BCDIN3D	A/G	0.03	0.37	1
rs7313924	12:89899912	POC1B/CORD20/PIX1/WDR51B/TUWD12	C/G	0.0101	0.26	0.98
rs7958206	12:39329294	CPNE8	A/G	0.0014	0.38	0.98
rs7965658	12:49987929	FAM186B/C12orf25	A/G	-0.0016	0.2	0.98
rs7968230	12:133481917	ZNF605	A/G	0.0131	0.3	0.97
rs7973955	12:118409640	KSR2	A/G	-0.0126	0.27	1
rs7975187	12:60964108		A/G	-0.0128	0.22	1
rs884282	12:117579274	FBXO21/FBX21	T/C	-0.0093	0.42	0.98
rs1006353	13:28047269	MTIF3/IF3mt	A/G	0.0126	0.27	1
rs1045411	13:31033232	HMGB1/HMG-1/HMG1/SBP-1/HMG3	T/C	-0.0148	0.22	0.96
rs10467530	13:54694130	MIR1297/mir-1297/hsa-mir-1297/MIRN1297	C/G	0.0148	0.15	0.91
rs1218822	13:28011963	MTIF3/IF3mt	A/G	0.0168	0.31	1
rs12429545	13:54102206	OLFM4/bA209J19.1/GW112/OlfD/GC1/hGC-1/hOLfD/OLM4/UNQ362	A/G	0.0316	0.12	1
rs1333423	13:59425111		A/T	0.0168	0.25	1
rs1668633	13:78371890	SLAIN1/C13orf32	T/C	0.01	0.43	1
rs1927790	13:96922191	HS6ST3/HS6ST-3	T/C	-0.0148	0.43	1
rs2479958	13:111984244	C13orf16/bA474D23.1/C13orf16	A/G	0.0154	0.47	0.98
rs629443	13:76386075	LMO7/LOMP/FBXO20/FBX20/LMO7b	T/G	0.0116	0.28	1
rs7334078	13:99120484	STK24/STE20/STK3/HEL-S-95/MST3B/MST3	T/C	0.0121	0.28	0.99
rs892261	13:65884191		T/C	-0.0103	0.42	0.99
rs9507983	13:28620036	FLT3/STK1/CD135/FLK2/FLK-2	T/C	-0.0156	0.41	1
rs9527706	13:58402479	PCDH17/PCH68/PCDH68	A/G	-0.0115	0.24	0.99
rs9530843	13:79563749	RBM26/PPP1R132/SE70-2/ARRS2/PRO1777/ZC3H17/C13orf10	A/C	0.0128	0.44	0.96
rs9538141	13:59178258		A/G	0.0164	0.44	0.96
rs9540493	13:66205704		A/G	0.0139	0.41	0.99
rs9544915	13:36230485	MIR548F5/MIRN548F5/MIR548F-5/hsa-mir-548f-5	T/C	0.014	0.14	0.99
rs9554263	13:28681228	FLT3/STK1/CD135/FLK2/FLK-2	C/G	-0.0109	0.22	0.96
rs9571687	13:67472713	PCDH9	A/C	-0.0129	0.33	0.99
rs9595908	13:33184288	PDS5B/AS3/APRIN/CG008	T/C	0.0159	0.39	0.99
rs9603697	13:40783323		T/C	0.0141	0.33	1
rs10131890	14:97258752	VRK1/PCH1A/PCH1	A/C	-0.0222	0.06	0.98
rs10132280	14:25928179	STXBP6/HSPC156/amisyn	A/C	-0.0223	0.31	0.96
rs10146527	14:79499850	NRXN3/C14orf60	T/C	0.0137	0.36	0.98
rs11844682	14:65910844	FUT8/CDGF/CDGF1	C/G	-0.0099	0.35	0.99
rs1205106	14:72269668	SIPA1L1/SPAR1/E6TP1	A/G	-0.0084	0.41	1
rs12147845	14:101144596	C14orf70/C14orf70	T/C	0.0199	0.1	0.97
rs12587412	14:47272423	MDGA2/c14_5286/MAMDC1	T/G	0.0146	0.49	0.97
rs12888545	14:88308044	GALC	A/G	-0.0136	0.24	0.99
rs17096552	14:98626578	C14orf64/C14orf64	A/G	-0.0145	0.15	0.99
rs17105272	14:77529783	IRF2BPL/NEDAMSS/EAP1/C14orf4	T/C	0.011	0.33	0.94
rs17522122	14:33302882	AKAP6/AKAP100/PRKA6/ADAP100/mAKAP/ADAP6	T/G	0.0159	0.48	0.98
rs1951455	14:91512339	RPS6KA5/MSK1/MSPK1/RLPK	T/C	-0.0145	0.31	0.9
rs1956151	14:40101060	FBXO33/BMND12/c14_5247/Fbx33	A/G	-0.013	0.21	1
rs2003616	14:79903993	NRXN3/C14orf60	T/G	0.0046	0.32	1
rs2160077	14:92428410	TRIP11/GMAP-210/CEV14/ODCD/GMAP210/ACG1A/TRIP-11/TRIP230	A/G	0.0093	0.41	1
rs217671	14:62360464	SNAPC1/SNAP43/PTFgamma	A/G	-0.0144	0.24	1
rs2412107	14:65426216	CHURC1-FNTB/FTase-beta/FNTB	T/G	0.0112	0.22	0.97
rs3803286	14:103246470	TRAF3/LAP1/CAP-1/CAP1/IIAE5/CRAF1/CD40bp/RNF118	A/G	0.0181	0.33	0.99
rs3850422	14:99671788	BCL11B/ZNF856B/ATL1-gamma/ATL1-delta/IMD49/CTIP2/CTIP-2/RIT1/ATL1-beta/ATL1/hRIT1-alpha/IDDFSTA/ATL1-alpha	A/G	-0.0114	0.44	1
rs3902951	14:69789755	GALNTL1/GALNACT16/GALNTL1/GalNAc-T16	T/G	-0.0134	0.23	0.97
rs4981693	14:29680331	PRKD1/CHDED/PKC-MU/PRKCM/PKD/PKCM	A/G	0.0206	0.24	1
rs7144011	14:79940383	NRXN3/C14orf60	T/G	0.0282	0.19	1
rs7147503	14:101539384	MIR656/hsa-mir-656/MIRN656/mir-656	T/C	-0.0119	0.35	0.99
rs799132	14:82684748		A/T	-0.011	0.22	0.94
rs8016771	14:102649451	WDR20/DMR	T/G	-0.019	0.08	0.96
rs8016859	14:30484722	PRKD1/CHDED/PKC-MU/PRKCM/PKD/PKCM	C/G	0.0349	0.04	0.95
rs9806058	14:35673470	KIAA0391/MRPP3/KIAA0391	A/T	0.0164	0.13	0.99
rs11259933	15:84580156	ADAMTSL3/ADAMTSL-3	A/G	-0.0066	0.46	1
rs11629783	15:66741387	MAP2K1/MKK1/PRKMK1/MEK1/MAPKK1/CFC3	C/G	0.0146	0.24	0.97
rs11635675	15:63793238	USP3/UBP/SIH003	T/G	0.0124	0.39	1
rs11855853	15:78012618	LINGO1/LRRN6A/LERN1/MRT64/UNQ201	T/C	-0.0145	0.24	0.99
rs12101393	15:92570921	SLCO3A1/OATPD/SLC21A11/OATP-D/OATPRP3/OATP-RP3/OATP3A1	C/G	0.0127	0.17	1
rs12439798	15:46584787		T/G	0.0125	0.45	1
rs12593036	15:81058652	FAM108C1/FAM108C1	A/G	0.0154	0.31	1
rs12595749	15:79432359	RASGRF1/CDC25L/CDC25/GRF1/PP13187/GRF55/H-GRF55/GNRP/ras-GRF1	A/G	0.0141	0.42	1
rs12902742	15:83647483	FAM103A1/FAM103A1/HsT19360/RAM/RAMMET/C15orf18	A/T	0.0142	0.12	0.98
rs13329567	15:68104367	MAP2K5/HsT17454/PRKMK5/MEK5/MAPKK5	T/C	-0.0293	0.23	1
rs150353	15:89928189		T/G	-0.0095	0.45	1
rs1657930	15:57120989	LOC145783	A/G	-0.0123	0.23	0.99
rs16951319	15:68103632	MAP2K5/HsT17454/PRKMK5/MEK5/MAPKK5	T/C	-0.007	0.15	1
rs17238110	15:62150364	VPS13C/PARK23	A/G	0.0353	0.02	0.99
rs2459359	15:76863838	SCAPER/Zfp291/ZNF291/MSTP063/IDDRP	C/G	0.0092	0.05	0.99
rs2593280	15:76150965	UBE2Q2	A/G	0.0105	0.16	0.94
rs316611	15:41751678	RTF1/KIAA0252/GTL7	T/C	0.0104	0.25	0.95
rs340025	15:60908307	RORA/RZRA/ROR3/NR1F1/RZR-ALPHA/IDDECA/ROR2/ROR1	T/C	-0.0124	0.44	1
rs3736485	15:51748610	DMXL2/DFNA71/PEPNS/RC3	A/G	0.0134	0.46	0.98
rs403656	15:76755506	SCAPER/Zfp291/ZNF291/MSTP063/IDDRP	A/G	0.0094	0.15	1
rs4284600	15:31843528	OTUD7A/OTUD7/C16ORF15/C15orf16/CEZANNE2	T/C	-0.0118	0.47	0.98
rs4886506	15:77207277	RCN2/ERC-55/ERC55/TCBP49/E6BP	T/G	-0.0008	0.28	0.99
rs4886869	15:77799657	HMG20A/HMGXB1/HMGX1	A/G	-0.01	0.41	0.98
rs4906908	15:27040082	GABRB3/EIEE43/ECA5	T/G	-0.0103	0.48	1
rs6494481	15:64849904	ZNF609	T/G	0.012	0.12	0.96
rs6495252	15:78117685	LOC645752	T/C	0.0099	0.41	0.99
rs7164727	15:73093991	ADPGK/2610017G09Rik/ADP-GK	T/C	0.0182	0.31	0.99
rs7181498	15:95271404	MCTP2	T/C	0.0163	0.35	1
rs7181610	15:35826859	ATPBD4/ATPBD4	A/T	0.0145	0.14	0.99
rs8024932	15:77915282	LINGO1/LRRN6A/LERN1/MRT64/UNQ201	T/G	0.0091	0.11	1
rs8033510	15:61445514	RORA/RZRA/ROR3/NR1F1/RZR-ALPHA/IDDECA/ROR2/ROR1	T/C	0.0106	0.38	0.99
rs8036040	15:36402716	C15orf41/HH114	A/C	0.0109	0.5	0.99
rs10083803	16:6701400	RBFOX1/FOX1/2BP1/FOX-1/A2BP1/HRNBP1	T/C	-0.0127	0.26	0.99
rs10500548	16:69174141	CIRH1A/CIRHIN/TEX292/CIRH1A/NAIC	T/C	0.0188	0.04	0.96
rs1057452	16:29833714	C16orf53/PA1/GAS/C16orf53	A/G	0.0173	0.14	1
rs11074446	16:20255123	GP2/ZAP75	T/C	0.0225	0.12	0.99
rs11075489	16:62803841		T/C	-0.0111	0.49	0.99
rs11075986	16:53805344	FTO/ALKBH9/BMIQ14/GDFD	C/G	0.032	0.08	0.99
rs11866815	16:387867	AXIN1/AXIN/PPP1R49	T/C	-0.0156	0.27	0.98
rs12443621	16:52548037	TOX3/TNRC9/CAGF9	A/G	-0.0096	0.48	1
rs12446632	16:19935389	GPRC5B/RAIG-2/RAIG2	A/G	-0.0352	0.13	1
rs12448257	16:3599655	NLRC3/CLR16.2/NOD3	A/G	0.0184	0.23	0.94
rs12448738	16:56489343	OGFOD1/TPA1	A/C	-0.0168	0.13	0.98
rs12920590	16:67420603	LRRC36/XLHSRF2/RORBP70	T/C	-0.0029	0.38	0.84
rs12922346	16:82438337	CDH13/P105/CDHH	C/G	0.0136	0.27	0.95
rs1549293	16:31141993	MYST1/MYST1/hMOF/ZC2HC8/MOF	T/C	-0.0204	0.4	1
rs1564981	16:50986308	CYLD/SBS/CYLD1/TEM/USPL2/EAC/CDMT/MFT1/MFT/BRSS/CYLDI	A/G	0.0087	0.49	0.99
rs16952479	16:53770578	FTO/ALKBH9/BMIQ14/GDFD	A/T	-0.0153	0.05	0.77
rs17795934	16:51926509		T/C	-0.0087	0.29	0.98
rs2075205	16:54153099	FTO/ALKBH9/BMIQ14/GDFD	A/T	0.0111	0.4	0.99
rs2080454	16:49062590	CBLN1	A/C	-0.0129	0.34	1
rs2516739	16:2097158	NTHL1/hNTH1/NTH1/FAP3/OCTS3	A/G	-0.0159	0.25	0.88
rs2534760	16:6509009	RBFOX1/FOX1/2BP1/FOX-1/A2BP1/HRNBP1	A/T	-0.0099	0.3	1
rs2863981	16:68295598	PLA2G15/ACS/LLPL/LYPLA3/LPLA2/GXVPLA2	A/G	0.0077	0.45	0.98
rs3794702	16:3730613	TRAP1/HSP90L/HSP75/TRAP-1	A/T	0.0038	0.19	0.97
rs3814883	16:29994922	TAOK2/PSK/MAP3K17/PSK1/PSK1-BETA/TAO1/TAO2	T/C	0.0232	0.45	0.88
rs4783241	16:82650384	CDH13/P105/CDHH	C/G	-0.0108	0.46	0.99
rs4985155	16:15129459	PDXDC1/LP8165	A/G	0.012	0.35	0.94
rs6564360	16:76779612	CNTNAP4/CASPR4	A/G	-0.0135	0.19	0.99
rs7187776	16:28857645	TUFM/COXPD4/EFTU/EF-TuMT/P43	A/G	-0.0265	0.34	1
rs7195386	16:24578458	RBBP6/PACT/MY038/RBQ-1/P2P-R/SNAMA	T/C	0.0133	0.5	1
rs7206608	16:82872628	CDH13/P105/CDHH	C/G	-0.0132	0.28	0.99
rs756717	16:72996162	ZFHX3/ZNF927/ATBT/ATBF1	A/G	-0.0148	0.39	0.95
rs7919	16:70514828	COG4/CDG2J/SWILS/COD1	A/C	-0.0158	0.44	0.97
rs8046061	16:80752293	CDYL2/PCCP1	T/C	0.009	0.43	1
rs825680	16:73606563	HTA/FJ222407/HTA	A/T	0.0104	0.42	0.91
rs868554	16:20050466	GPR139/PGR3/GPRg1	C/G	-0.019	0.25	0.89
rs879620	16:4015729	ADCY9/AC9/ACIX	T/C	0.0231	0.4	0.99
rs889398	16:69556715	NFAT5/NFATL1/TONEBP/OREBP/NF-AT5/NFATZ	T/C	-0.0196	0.42	1
rs907011	16:54234492	IRX3/IRX-1/IRXB1	T/G	0.0102	0.3	0.98
rs952159	16:71965915	PKD1L3	A/G	-0.0002	0.29	0.99
rs977540	16:9724750	GRIN2A/FESD/NR2A/GluN2A/EPND/NMDAR2A/LKS	A/G	0.014	0.27	0.99
rs9922708	16:53831146	FTO/ALKBH9/BMIQ14/GDFD	T/C	0.0692	0.44	0.99
rs9927848	16:23833071	PRKCB/PKCI(2)/PKCB/PKC-beta/PKCbeta/PRKCB1/PRKCB2	A/C	-0.0122	0.26	1
rs9931164	16:53825238	FTO/ALKBH9/BMIQ14/GDFD	A/G	0.0245	0.01	0.97
rs9931407	16:67290155	SLC9A5/NHE5	T/C	-0.0008	0.04	0.98
rs9931967	16:20375351	PDILT/PDIA7	T/G	0.0163	0.47	0.98
rs1000940	17:5283252	RABEP1/RAB5EP/RABPT5	A/G	-0.0154	0.29	0.99
rs1038088	17:28074563	SSH2/SSH-2/SSH-2L	T/G	-0.0117	0.49	0.97
rs1048775	17:79202329	C17orf56/ENTHD2/C17orf56	C/G	0.0061	0.49	0.95
rs10515050	17:51923847	KIF2B	T/C	-0.0077	0.44	1
rs1075901	17:15943910	NCOR1/N-CoR/N-CoR1/TRAC1/hN-CoR/PPP1R109	T/C	-0.0121	0.42	1
rs11079849	17:47090785	IGF2BP1/VICKZ1/CRDBP/IMP1/IMP-1/ZBP1/CRD-BP	T/C	-0.0188	0.32	0.96
rs12453418	17:31747629	ACCN1/ACCN1/ACCN/BNC1/MDEG/BNaC1/hBNaC1/ASIC2a	A/G	-0.0096	0.36	0.98
rs12602912	17:65870073	BPTF/FALZ/FAC1/NEDDFL/NURF301	T/C	0.0176	0.2	1
rs1285245	17:77796889	CBX4/PC2/NBP16	C/G	-0.0121	0.36	0.98
rs12939549	17:78611724	RPTOR/KOG1/Mip1	A/G	0.018	0.44	1
rs16966801	17:39573713	KRT37/K37/KRTHA7/HA7	A/G	-0.0156	0.2	1
rs17681708	17:9792872	GLP2R	T/C	-0.0106	0.27	0.99
rs208015	17:46252346	SKAP1/HEL-S-81p/SCAP1/SKAP55	T/C	0.0356	0.08	1
rs2537847	17:65694355	PITPNC1/RDGB-BETA/RDGBB1/RDGBB/M-RDGB-beta/MRDGBbeta	A/G	-0.0107	0.25	0.93
rs2619976	17:71754545	C17orf54/C17orf54	T/C	0.0104	0.41	0.96
rs4516268	17:1846831	RTN4RL1/NgR3/NGRH2	A/C	-0.0217	0.18	0.99
rs4796243	17:35057883	MRM1	A/G	-0.0124	0.32	0.99
rs4889782	17:78640510	RPTOR/KOG1/Mip1	T/C	-0.015	0.39	1
rs4969387	17:79081724	BAIAP2/BAP2/IRSP53/FLAF3	C/G	-0.0145	0.24	0.9
rs4986044	17:21261560	KCNJ12/IRK-2/IRK2/hIRK/Kir2.2/hIRK1/Kir2.2v/hkir2.2x/kcnj12x/KCNJN1	T/C	-0.0164	0.47	1
rs7209235	17:73759552	GALK1/GK1/HEL-S-19/GALK	A/G	-0.0111	0.31	0.94
rs7211567	17:31460899	ACCN1/ACCN1/ACCN/BNC1/MDEG/BNaC1/hBNaC1/ASIC2a	T/C	-0.0145	0.24	0.99
rs7217226	17:2136065	SMG6/hSMG5/7a/SMG-6/C17orf31/EST1A	T/G	-0.013	0.36	0.98
rs757608	17:59497277	C17orf82	A/G	-0.0092	0.34	1
rs8067737	17:29349688	RNF135/MMFD/REUL/Riplet/L13	T/C	0.0166	0.11	0.76
rs8069296	17:42935059	EFTUD2/Snrp116/Snu114/U5-116KD/MFDGA/SNRNP116/MFDM	T/C	-0.0104	0.15	0.91
rs8070454	17:38160754	PSMD3/S3/TSTA2/RPN3/P58	T/C	-0.0098	0.34	1
rs8071182	17:55336155	MSI2/MSI2H	A/G	0.0133	0.18	0.98
rs8075273	17:61728881	MAP3K3/MAPKKK3/MEKK3	A/C	-0.0133	0.29	1
rs8079034	17:5412361	NLRP1/NAC/MSPC/AIADK/DEFCAP/SLEV1/VAMAS1/DEFCAP-L/S/NALP1/CLR17.1/CIDED/CARD7/PP1044	T/C	0.0096	0.18	0.95
rs8081039	17:75995829	TNRC6C	T/C	0.0233	0.07	0.94
rs886444	17:46051911	CDK5RAP3/IC53/PP1553/C53/LZAP/OK/SW-cl.114/MST016/HSF-27	A/G	-0.0102	0.4	1
rs9299	17:46669430	HOXB5/HOX2/HHO.C10/HU-1/Hox2.1/HOX2A	T/C	0.0121	0.36	1
rs9905991	17:80052073	FASN/FAS/SDR27X1/OA-519	A/G	0.01	0.48	0.84
rs10438964	18:42950629	SLC14A2/UTR/UTA/hUT-A6/HUT2/UT2/UT-A2	T/C	-0.0127	0.28	0.99
rs11150911	18:73498528	C18orf62/C18orf62	A/C	0.0133	0.29	1
rs12327272	18:57726627	PMAIP1/APR/NOXA	A/G	0.0053	0.1	0.98
rs1241986	18:6873954	ARHGAP28	A/G	-0.0139	0.14	0.97
rs12964689	18:21116998	NPC1/POGZ/SLC65A1/NPC	A/G	0.0203	0.43	1
rs1365466	18:36182440		T/C	-0.0137	0.27	1
rs1498139	18:51478026	MBD2/NY-CO-41/DMTase	A/C	0.0105	0.29	1
rs1608445	18:947954	ADCYAP1/PACAP	A/G	-0.0104	0.46	0.94
rs16965062	18:31581247	NOL4/CT125/NOLP/HRIHFB2255	T/C	0.009	0.45	1
rs1787267	18:76742544	SALL3/ZNF796	C/G	-0.0237	0.05	0.97
rs1791253	18:37103550		T/G	0.0187	0.07	0.98
rs1941697	18:31251276	ASXL3/BRPS/KIAA1713	A/G	0.0123	0.45	0.99
rs2000746	18:57677294	PMAIP1/APR/NOXA	A/G	0.0181	0.25	0.97
rs2012927	18:63297672	CDH7/CDH7L1	A/G	0.0129	0.36	1
rs2229616	18:58039276	MC4R	T/C	-0.106	0.02	0.97
rs273697	18:23178748	ZNF521/Evi3/EHZF	A/G	-0.0098	0.49	1
rs555267	18:40992698	SYT4/HsT1192	T/G	0.0126	0.32	1
rs663129	18:57838401	MC4R	A/G	0.0545	0.25	1
rs7239114	18:45921214	CTIF/Gm672/KIAA0427	A/G	0.0124	0.48	0.98
rs7243357	18:56883319	GRP/preproGRP/BN/GRP-10/proGRP	T/G	0.0194	0.18	0.98
rs8087550	18:58371566	MC4R	A/C	-0.0003	0.49	0.97
rs8089514	18:69224478		A/T	0.0126	0.37	0.94
rs8092503	18:52479487	RAB27B/C25KG	A/G	-0.0165	0.2	1
rs8094523	18:57878155	MC4R	A/G	-0.0305	0.07	1
rs8095404	18:57804346	PMAIP1/APR/NOXA	A/T	-0.0259	0.45	0.92
rs954018	18:42598463	SETBP1/SEB/MRD29	A/G	-0.013	0.29	1
rs9675376	18:57969244	MC4R	A/G	0.035	0.27	0.98
rs9951893	18:60739250	BCL2/Bcl-2/PPP1R50	T/C	-0.0115	0.44	1
rs9961813	18:57853056	MC4R	A/C	0.013	0.08	0.95
rs10408013	19:33963766	PEPD/PROLIDASE	T/C	0.0111	0.3	1
rs11668301	19:31016196	ZNF536	A/G	0.021	0.13	0.99
rs11672660	19:46180184	GIPR/PGQTL2	T/C	-0.034	0.2	1
rs12609744	19:12994140	KLF1/EKLF/EKLF/KLF1	T/C	-0.0126	0.27	0.95
rs17724992	19:18454825	PGPEP1/PAP-I/Pcp/PGI/PGPI/PGP/PGP-I	A/G	0.0183	0.27	1
rs2075650	19:45395619	TOMM40/PEREC1/PER-EC1/C19orf1/TOM40/D19S1177E	A/G	0.0244	0.12	1
rs2304130	19:19789528	ZNF101/HZF12	A/G	0.0176	0.08	1
rs273504	19:18215247	MAST3	A/G	-0.0153	0.44	0.98
rs2866816	19:30683879	C19orf2/PPP1R19/C19orf2/RMP/NNX3/URI	T/C	0.0129	0.28	0.99
rs29938	19:34311481	KCTD15	T/C	-0.015	0.32	1
rs3810291	19:47569003	ZC3H4/C19orf7	A/G	0.0274	0.32	0.89
rs3826705	19:42637232	MIR4323	T/C	-0.0157	0.12	0.99
rs757318	19:18820308	CRTC1/MAML2/MECT1/Mam-2/WAMTP1/TORC1/TORC-1	A/C	-0.0185	0.48	1
rs8102137	19:30296853	CCNE1/pCCNE1/CCNE	T/C	-0.0193	0.32	1
rs895330	19:4060707	ZBTB7A/ZNF857A/FBI-1/LRF/TIP21/ZBTB7/pokemon/FBI1	C/G	0.0201	0.21	0.94
rs998732	19:19378671	TM6SF2	A/G	0.0171	0.17	0.99
rs1040881	20:15099816	MACROD2/C2orf133/C20orf133	T/C	0.0106	0.33	1
rs12480713	20:15801600	MACROD2/C2orf133/C20orf133	T/C	0.007	0.45	0.93
rs12625413	20:62380542	ZBTB46/dJ583P15.8/RINZF/dJ583P15.7/ZNF340/BTBD4/BZEL	T/C	-0.0079	0.34	0.95
rs13045538	20:33595525	TRPC4AP/TRRP4AP/PPP1R158/TRUSS/C20orf188	T/C	-0.0088	0.03	0.46
rs143384	20:34025756	GDF5/LAP-4/SYM1B/BDA1C/OS5/LAP4/BMP-14/BMP14/SYNS2/CDMP1	A/G	-0.0007	0.44	0.93
rs1512065	20:53453326	DOK5/C20orf180/IRS6/IRS-6	A/G	0.0138	0.22	0.99
rs17091470	20:32606299	RALY/HNRPCL2/P542	T/G	0.0015	0.08	0.99
rs17806379	20:51107290	ZFP64/ZNF338	T/C	-0.0258	0.18	1
rs1884389	20:1410582	NSFL1C/P47/UBX1/UBXN2C/UBXD10/dJ776F14.1	T/C	-0.0103	0.41	0.98
rs1884897	20:6612832	BMP2/BDA2/SSFSC/BMP2A	A/G	-0.0194	0.36	1
rs2143253	20:41987392	SRSF6/B52/SFRS6/SRP55/HEL-S-91	A/G	-0.0188	0.15	0.99
rs2386802	20:25971327	LOC100134868	A/C	-0.004	0.33	0.94
rs2425241	20:35018412	DLGAP4/DLP4/DAP-4/SAPAP4/DAP4/SAPAP-4	T/C	-0.0197	0.05	0.81
rs2425857	20:44914134	CDH22/dJ998H6.1/C20orf25	A/G	0.0116	0.45	1
rs310618	20:62127121	EEF1A2/EF1A/STN/EIEE33/STNL/HS1/EEF1AL/EF-1-alpha-2/MRD38	T/C	-0.0108	0.33	0.89
rs3746429	20:33703607	EDEM2/C20orf49/bA4204.1/C20orf31	T/C	0.011	0.18	1
rs4814512	20:16564210	KIF16B/SNX23/KISC20ORF/C20orf23	A/C	0.0133	0.23	1
rs559267	20:54157497	CBLN4/CBLNL1	A/G	-0.0115	0.33	1
rs6011457	20:61530915	DIDO1/DATF-1/DATF1/BYE1/DIO-1/DIO1/C20orf158/DIDO3/DIDO2/dJ885L7.8	A/T	-0.0116	0.48	0.99
rs6019482	20:47495560	ARFGEF2/BIG2/dJ1164I10.1/PVNH2	T/C	-0.0178	0.13	0.98
rs6058635	20:30891925	KIF3B/HH0048/KLP-11/FLA8	C/G	-0.0008	0.45	1
rs6076348	20:25401827	GINS1/PSF1/IMD55	A/G	-0.0012	0.34	0.94
rs6088529	20:33170752	PIGU/CDC91L1/GAB1	A/C	0.001	0.36	0.98
rs6088943	20:34420023	PHF20/TZP/C20orf104/HCA58/NZF/GLEA2/TDRD20A	A/T	0.011	0.07	0.76
rs6121381	20:30785593	PLAGL2/ZNF900	A/T	-0.0147	0.16	1
rs6138482	20:25059442	VSX1/RINX/PPD/PPCD/CAASDS/PPCD1/KTCN1/KTCN	T/C	0.0147	0.2	1
rs6142096	20:32686658	EIF2S2/EIF2beta/EIF2/eIF-2-beta/EIF2B/PPP1R67	A/G	0.0137	0.45	0.99
rs676749	20:3026069	GNRH2/LH-RHII/GnRH-II	A/T	-0.0104	0.48	0.96
rs753010	20:29857455	DEFB115/DEFB-15	C/G	-0.0093	0.04	0.57
rs8121840	20:30504530	TTLL9/C20orf125	A/G	0.0085	0.49	1
rs8123881	20:15819495	MACROD2/C2orf133/C20orf133	A/G	-0.0196	0.1	0.99
rs8567	20:62522315	TPD52L2/D54/TPD54	A/G	-0.009	0.45	1
rs13047416	21:40309436	ETS2/ETS2IT1	C/G	0.0154	0.37	0.96
rs2836961	21:40627020	BRWD1/N143/DCAF19/C21orf107/WRD9/WDR9	A/C	-0.0102	0.38	1
rs2838006	21:42653567	BACE2/ASP21/DRAP/BAE2/CEAP1/ALP56/AEPLC/CDA13/ASP1	T/C	-0.0126	0.36	1
rs427943	21:46570896	ADARB1/RED1/DRABA2/ADAR2/DRADA2	A/C	-0.017	0.45	0.97
rs762147	21:39238610	KCNJ6/KCNJ7/GIRK-2/BIR1/KPLBS/KATP-2/hiGIRK2/KATP2/KIR3.2/GIRK2	A/G	-0.0115	0.24	1
rs9979651	21:34153330	C21orf49/C21orf49	C/G	-0.0165	0.05	0.99
rs5750913	22:40640285	TNRC6B	A/G	-0.0012	0.22	0.98
rs9615905	22:48875699	FAM19A5/TAFA-5/FAM19A5/UNQ5208/QLLK5208	T/C	0.011	0.44	0.96
		* 862 out of 941 SNPs reported by Yengo et al 2018 were included after excluding 61 SNPs with high LD (R2 > 0.2), 2 SNPs with poor imputation quality (R2 < 0.3), and 16 SNPs with smoking association.
		** GRCh37
		*** Nearest gene within ± 500kb of the SNP, retrieved by SNIPPER v1.2 (http://csg.sph.umich.edu/boehnke/snipper/)
